1 **CRISPR enriches for cells with mutations in a p53-related interactome, and**  
2 **this can be inhibited.**

3 Long Jiang<sup>1</sup>, Katrine Ingelshed<sup>2</sup>, Yunbing Shen<sup>1</sup>, Sanjaykumar V. Boddul<sup>1</sup>, Vaishnavi  
4 Srinivasan Iyer<sup>1,3</sup>, Zsolt Kasza<sup>1</sup>, Saikiran Sedimbi<sup>2</sup>, David P. Lane<sup>2,4</sup>, and Fredrik Wermeling<sup>1\*</sup>

5  
6 1. Department of Medicine Solna, Center for Molecular Medicine, Karolinska University  
7 Hospital and Karolinska Institutet, Stockholm, Sweden.

8 2. Department of Microbiology, Tumor and Cell Biology, Karolinska Institutet, Stockholm,  
9 Sweden.

10 3. School of Physical and Mathematical Sciences, Nanyang Technological University,  
11 Singapore.

12 4. p53 Laboratory (p53Lab), Agency for Science, Technology, and Research (A\*STAR),  
13 Singapore.

14

15 \* Corresponding author. Center for Molecular Medicine, L8:03, Karolinska University  
16 Hospital, 171 76 Stockholm, Sweden. Email: [fredrik.wermeling@ki.se](mailto:fredrik.wermeling@ki.se).

17

18 **CRISPR/Cas9 can be used to inactivate or modify genes by inducing double-stranded**  
19 **DNA breaks<sup>1-3</sup>. As a protective cellular response, DNA breaks result in p53-mediated cell**  
20 **cycle arrest and activation of cell death programs<sup>4,5</sup>. Inactivating p53 mutations are the**  
21 **most commonly found genetic alterations in cancer, highlighting the important role of the**  
22 **gene<sup>6-8</sup>. Here, we show that cells deficient in p53, as well as in genes of a core CRISPR-**  
23 **p53 tumor suppressor interactome, are enriched in a cell population when CRISPR is**  
24 **applied. Such enrichment could pose a challenge for clinical CRISPR use. Importantly,**  
25 **we identify that transient p53 inhibition suppresses the enrichment of cells with these**  
26 **mutations. Furthermore, in a data set of >800 human cancer cell lines, we identify**  
27 **parameters influencing the enrichment of p53 mutated cells, including strong baseline**  
28 **CDKN1A expression as a predictor for an active CRISPR-p53 axis. Taken together, our**  
29 **data identify strategies enabling safe CRISPR use.**

30 The CRISPR molecular biology tool has immense potential for clinical gene therapy use<sup>9</sup>.  
31 Correcting disease-causing mutations in congenital monogenic disorders affecting for example  
32 the hematopoietic system are apparent candidates, and clinical trials for sickle cell anemia and  
33 beta-thalassemia are ongoing<sup>10-12</sup>. CRISPR-mediated modifications of cells used for chimeric

34 antigen receptor (CAR) based immunotherapy is another clinical setting where CRISPR is  
35 likely to have a large impact<sup>13,14</sup>. Concerns about the safety of CRISPR-based gene therapy are  
36 successfully being addressed at multiple levels. This includes risks related to CRISPR off-target  
37 activity, where, for example, sgRNA design with low off-target activity<sup>15</sup>, high fidelity Cas9  
38 versions<sup>16</sup>, and methods for the evaluation of off-target mutations<sup>17</sup> has been an intense research  
39 focus. Another risk that has been suggested is that the CRISPR-mediated DNA damage could  
40 give cells with mutations in *p53* (also referred to as *TP53* in humans, and *Trp53* in mice) a  
41 selective advantage and thereby be enriched in a cell population exposed to CRISPR<sup>18-20</sup>.  
42 Notably, *TP53* mutations are seen in human embryonic stem cell lines<sup>21</sup> and also contribute to  
43 clonal hematopoiesis<sup>22,23</sup> showing that premalignant *TP53* mutations can be found in different  
44 cell populations of relevance for clinical CRISPR use.

45 To address the risk of enriching for cells with *p53* mutations using CRISPR, we initially  
46 studied the cellular response following CRISPR (electroporation of a GFP targeting sgRNA  
47 with very low off-target activity, as calculated by Cas-OFFinder<sup>24</sup>), and compared it to the  
48 response following a pulse of Etoposide (a topoisomerase II inhibitor causing DNA damage  
49 and *p53* activation<sup>25</sup>), or AMG232 (an inhibitor activating *p53* by interfering with the MDM2-  
50 *p53* interaction<sup>26</sup>). Using a cell line derived from mouse hematopoietic stem cells of Cas9+  
51 GFP+ mice (**Supplementary Fig. 1a-d**), we observed that the CRISPR event resulted in partial  
52 delayed cell growth (**Fig. 1b**), apoptosis induction (**Fig. 1c**), and transcription of *Cdkn1a* (also  
53 referred to as *p21*, a *p53* target gene central to DNA damage-induced cell cycle arrest  
54 response<sup>27</sup>, **Fig. 1d**), although at a lower magnitude compared to AMG232 (Fig. 1b), and  
55 Etoposide (Fig. 1b-d). To explore if this relatively mild phenotype was sufficient to give a  
56 selective advantage to cells with mutations in *Trp53*, we established a competitive assay, where  
57 *Trp53* KO and WT cells were mixed at a 1:4 ratio, and subsequently exposed to CRISPR  
58 (electroporation or lentiviral delivery of sgRNA), or to pharmacological *p53* activation with  
59 AMG232 or Etoposide (**Fig. 1e**). Notably, the proportion of *Trp53* KO cells in the population  
60 did not expand significantly by only being cultured, or by being transduced by non-targeting  
61 control (NTC) lentiviral particles, as identified by sequencing the *Trp53* locus after seven days  
62 in culture. However, the proportion of *Trp53* KO cells did significantly expand after being  
63 exposed to CRISPR, AMG232, and Etoposide (**Fig. 1f and Supplementary Fig. 1e**), as well  
64 as hypoxia (**Supplementary Fig. 1f-h**). The level of enrichment mirrored the severity of the  
65 cellular phenotype shown in figure 1b-d, with Etoposide and AMG232 causing a significantly  
66 higher enrichment of *Trp53* KO cells compared to CRISPR. Based on this, we hypothesized  
67 that the level of DNA damage response induced by sgRNAs could be a parameter affecting the

68 enrichment of *Trp53* KO cells. To this end, we designed a set of sgRNAs with different off-  
69 target activity and used them alone or in combination at equimolar concentrations, and  
70 compared the induction of *Cdkn1a* transcription at early time points (0-24h), as a proxy for p53  
71 activation, to the enrichment of cells with *Trp53* mutations at a later time points (seven days).  
72 We found that the level of early CRISPR-induced *Cdkn1a* transcription correlated with the  
73 enrichment of *Trp53* KO cells, and that the level of enrichment could be estimated based on the  
74 level of off-target activity one, or a combination, of sgRNAs would give (**Fig. 1g-h and**  
75 **Supplementary Fig. 2a-c**). This suggests that the level of induced *Cdkn1a* expression could be  
76 a relevant parameter for sgRNA selection.

77 The enrichment of cells with inactive p53 could pose a challenge to the clinical use of  
78 CRISPR. Therefore, we set out to identify strategies that could be used to suppress the  
79 enrichment. We hypothesized that inhibiting p53, or proteins playing a non-redundant role in  
80 the p53 pathway could be a viable strategy. We gathered a selection of potentially relevant  
81 inhibitors (**Fig. 1i**), and pretreated cells with the inhibitors followed by exposing them to  
82 CRISPR. Importantly, we found that treating the cells with a *Trp53* siRNA completely inhibited  
83 the enrichment of cells with *Trp53* mutations, while the other used inhibitors did not show  
84 sufficient activity (**Fig. 1j and Supplementary Fig. 3**). We also noted that the pan-Caspase  
85 inhibitor Z-VAD did not significantly suppress the enrichment of cells with *Trp53* mutations  
86 (**Fig. 1k**), suggesting that apoptosis is not a significant driver in the CRISPR-mediated  
87 enrichment of *Trp53* KO cells. We concluded (i) that cells with inactivating *Trp53* mutations  
88 are enriched following exposure to CRISPR, (ii) that this correlates to the level of triggered  
89 DNA damage response, and (iii) that transient inhibition of p53 can completely abrogate this  
90 enrichment.

91 Next, we set out to identify p53 linked genes playing a non-redundant role in the CRISPR-  
92 induced DNA damage response. Such genes could represent additional drug targets to modify  
93 the CRISPR-p53 response and, importantly, cells with mutations in such genes could be  
94 enriched by CRISPR-mediated DNA damage. To this end, we applied a custom CRISPR screen  
95 library targeting 395 DNA damage-related genes and controls, with 1640 sgRNAs  
96 (**Supplementary Table 1**), to WT and *Trp53* KO cells. Relying on the DNA damage response  
97 induced by the introduction of the sgRNA library into Cas9+ cells, as has been used in the  
98 past<sup>19,28</sup>, we found that *Trp53* sgRNAs were enriched and that *Mdm2* sgRNAs were depleted  
99 in a p53 dependent manner, in both Hox and B16 cells (**Supplementary Fig. 4a-d**). In this  
100 regard, *Mdm2* behaved as an essential gene, where mutated cells are rapidly lost over time  
101 (**Supplementary Fig. 4e-f**). We also noted that the Hox cells, both *Trp53* WT and KO, but not

102 B16 cells, over time enriched for sgRNAs relating to type I IFN signaling (Stat1, Jak1, and  
103 Ptpcr), and were sensitive to induced type I IFN signaling (**Supplementary Fig. 4g-j, and**  
104 **Supplementary Table 2**).

105 Next, we performed a screen using the same sgRNA library, but this time culturing the cells  
106 for 14 days after the introduction of the library into the Hox cell population, and then applied a  
107 controlled CRISPR DNA damage event by electroporating a GFP targeting sgRNA, comparing  
108 it to an eight-hour pulse of AMG232 or Etoposide (**Fig. 2a**). In this way, we could separate the  
109 studied CRISPR event from the introduction of the CRISPR library. Seven days later we  
110 collected the different cell populations, sequenced the sgRNA barcodes, and deconvoluted the  
111 sgRNA enrichment/depletion using MAGeCK<sup>29</sup>. Comparing the different interventions to  
112 control-treated cells, we identified that CRISPR enriched for cells with mutations in *Chek2*,  
113 *Trp53*, and *Cdkn1a* (**Fig. 2b**); AMG232 enriched for cells with mutations in *Trp53* and *Cdkn1a*  
114 (**Fig. 2c**); and Etoposide enriched for cells with mutations in *Atm*, *Chek2*, *Trp53* and *Cdkn1a*  
115 (**Fig. 2d**). Notably, AMG232 also enriched for mutations in *Stat1*, and *Eif2ak2*, two genes  
116 related to type I IFN signaling (Fig. 2c), again highlighting this pathway in the Hox cells.  
117 Focusing on the *Atm*-*Chek2*-*Trp53*-*Cdkn1a* pathway, linking double-stranded DNA damage to  
118 cell cycle arrest<sup>4,5,27</sup>, we found that CRISPR caused a significant enrichment of sgRNAs  
119 targeting all these genes when comparing WT and *Trp53* KO cells (**Fig. 2e-h**) and that a *Trp53*  
120 siRNA could significantly suppress the enrichment of cells with mutations in *Chek2*, *Trp53*,  
121 and *Cdkn1a*, but not for *Atm* for which the enrichment phenotype also was the weakest (**Fig. 2i**  
122 **and Supplementary Fig. 5a**). Noteworthy, we did not observe any enrichment of sgRNAs  
123 targeting genes related to apoptosis (**Fig. 2j and Supplementary Fig. 5b**), in line with data  
124 presented by Haapaniemi et. al<sup>19</sup>, and the absence of activity of the pan-Caspase inhibitor Z-  
125 VAD (Fig. 1k). We concluded (i) that the *Atm*-*Chek2*-*Trp53*-*Cdkn1a* pathway plays a non-  
126 redundant role in the CRISPR-mediated DNA damage response (**Fig. 2k**), and as a consequence  
127 (ii) that cells with mutations in these tumor suppressor genes could be enriched in a cell  
128 population as CRISPR is applied, also if they are found at a low frequency (1:1640 in figure 2  
129 compared to 1:4 in figure 1e-j), and (iii) that a *Trp53* siRNA can suppress the enrichment of  
130 mutated cells to a large degree.

131 To expand our understanding of which mutations could be enriched in a cell population as  
132 CRISPR is applied, we next turned to the Depmap portal, containing full genome CRISPR  
133 screen data of 808 human cell lines (Public 20Q4 release), as well as, for example, baseline  
134 gene expression, mutation status, and drug sensitivity data for a large proportion of the same  
135 cells<sup>30-32</sup>. Exploring the database, we found that 103 of the 808 included cell lines (12.7%)

136 enriched for TP53 sgRNAs as defined by a score >1. Stratifying these cells based on *TP53*  
137 mutation status (WT or any type of mutation, making up 32.3% and 67.7% of the cell lines,  
138 respectively), we found that 94 of the 103 cell lines (91.3%) that enriched for TP53 sgRNAs  
139 were confined to the *TP53* WT group (**Fig. 3a**), supporting the validity of the analysis. As an  
140 anecdote, we also noted that the cell line with the strongest enrichment for TP53 sgRNAs is a  
141 version of the RPE-1 cell line (**Supplementary Table 3**), that has been used in a significant  
142 portion of previous publications related to p53 and CRISPR<sup>19,28,33,34</sup>. Next, we compared the  
143 TP53 sgRNA enrichment to the sensitivity of the cells to p53 modulating drugs. We found a  
144 clear correlation between TP53 sgRNA enrichment and the sensitivity to AMG232 (**Fig. 3b-c**),  
145 as well as to Nutlin-3 and CMG097 (both with a similar mode of action as AMG232), but not,  
146 for comparison, to the p53 inhibitor Pifithrin- $\mu$  (**Supplementary Fig. 6**). Taken together, we  
147 concluded that TP53 sgRNA enrichment in the Depmap dataset could be used to identify cells  
148 where the CRISPR-p53 pathway is active, and, as a consequence, that correlation to TP53  
149 sgRNA enrichment also could identify other factors influencing the pathway. In line with this  
150 concept, we found that TP53 sgRNA enrichment correlated strongly with MDM2 sgRNA  
151 depletion (**Fig. 3d**). Performing the same correlation analysis, but on a full genome basis, we  
152 identified a list of genes where sgRNA enrichment (+) or depletion (-) correlated with TP53  
153 sgRNA enrichment (**Fig. 3e and Supplementary Table 4**). The list contained the genes we had  
154 identified in our experimental data and expanded the list of genes playing a non-redundant,  
155 TP53-related role in the CRISPR-mediated DNA damage response. Furthermore, analyzing the  
156 top 10 enriched and depleted genes using geneMANIA, we noted a high level of physical  
157 interaction between the linked proteins (**Fig. 3f**). An alternative analysis approach of the data,  
158 identifying genes where sgRNA enrichment/depletion correlated with the *TP53* mutation status,  
159 instead of TP53 sgRNA enrichment (as in Fig. 3e), resulted in a list of genes with a large level  
160 of overlap with the list in figure 3e (**Supplementary Fig. 7 and Supplementary Table 5**).  
161 Based on the overlap of these lists, and the experimental data we highlight TP53, TP53BP1,  
162 CHEK2, ATM, CDKN1A, USP28, UBE2K, XPO7 as a core CRISPR-p53 tumor suppressor  
163 interactome, where cells with inactivating mutations or silencing of these genes (something that  
164 is commonly found in cancers<sup>6-8,35-39</sup>, **Supplementary Fig. 8**) can be expected to be enriched  
165 in cell population as CRISPR is applied. Furthermore, cells with copy number amplifications,  
166 overexpression, or activating mutations of *MDM2*, *PPM1D*, *MDM4*, *DDX31*, *USP7*, *PPM1G*,  
167 *WDR89*, and *TERF1* also observed in cancer<sup>40-45</sup>, could similarly be enriched by CRISPR.

168 Finally, we explored if specific gene expression patterns could predict if the CRISPR-p53  
169 axis is active in a cell, and thus if the cell would enrich for TP53 sgRNAs. Based on our data

170 identifying a central, non-redundant role for *CDKN1A* in the CRISPR-induced response, we  
171 tested if a strong baseline expression of *CDKN1A* could predict if cells would enrich for TP53  
172 sgRNAs. We found that this assumption was correct and that cells that enrich for TP53 sgRNAs  
173 with a few exceptions had a strong baseline *CDKN1A* expression (**Fig. 3g-h**), while, for  
174 example, *TP53* expression itself did not predict cells that would enrich for TP53 sgRNAs  
175 (**Supplementary Fig. 9a-b**). Correlating strong baseline gene expression with TP53 sgRNA  
176 enrichment, resulted in a list of genes that to a large extent were identified as transcription target  
177 genes for p53 (**Fig. 3i**), and these genes were also identified by geneMANIA to display a strong  
178 co-expression pattern (**Supplementary Fig. 9c-f**). Notably, the gene set we identify by  
179 analyzing the 800 cell lines overlaps to a large extent with published gene expression patterns  
180 induced by CRISPR-mediated DNA damage in specific cell lines<sup>18,46</sup>, as well as genes  
181 upregulated in cancers WT for *TP53*<sup>47</sup>. Even more, performing a tSNE dimensional reduction  
182 analysis based on the expression of the top 10 genes, identified that cells broadly clustered  
183 based on *TP53* mutation status and TP53 sgRNA enrichment (**Fig. 3j and Supplementary Fig.**  
184 **9g**). Interestingly, most of the cell lines that enriched for TP53 sgRNAs despite having *TP53*  
185 mutations also clustered with the *TP53* WT cells based on expression of the top 10 genes,  
186 suggesting that the specific mutations in those cell lines are not abrogating the p53 function  
187 sufficiently to cause a phenotype. Apart from *Cdkn1a*, the expression gene set list (Fig. 3i) does  
188 not overlap with genes identified to play a central role in the CRISPR-p53 pathway (Fig. 3e).  
189 This suggests that the upregulated genes are mainly an indication of active p53-mediated  
190 transcription in the cell, and not directly involved in the CRISPR response. *Eda2r* and *Ptchd4*  
191 knockout cells supported this notion by not behaving differently than WT cells in response to  
192 CRISPR in a mixed cell population (**Supplementary Fig. 9h-i**). This observation challenges  
193 the notion that p53 is only active during stress, by showing that a baseline p53-regulated gene  
194 expression pattern before exposure to the specific stressor, CRISPR in this case, predicts the  
195 subsequent p53-related response to the stressor.

196 In conclusion, here we set out to explore if and how cells with inactive p53 are enriched as  
197 CRISPR is applied to a cell population, something that could represent a challenge for the  
198 clinical use of CRISPR. We identify that cells with mutations in *p53* indeed are enriched as  
199 CRISPR is applied, and that it correlates to the level of induced DNA damage response,  
200 highlighting the induction of *CDKN1A* expression as a sgRNA selection criterion. Furthermore,  
201 we identify a core CRISPR-p53 interactome, with genes that display a large level of physical  
202 interaction. Mutations or duplications of these genes could be enriched as CRISPR is applied,  
203 and these genes should, therefore, be monitored in the clinical CRISPR setting. Transient p53

204 inhibition has been proposed as a strategy to increase CRISPR efficiency<sup>18-20</sup> and to retain the  
205 functionality of targeted cells<sup>46,48</sup>. Significantly, our data also show that transient p53 inhibition  
206 can limit the enrichment of mutations in the CRISPR-p53 tumor suppressor interactome, further  
207 supporting using transient p53 inhibition in the clinical CRISPR setting. Finally, we identify a  
208 gene expression profile, including strong baseline *CDKN1A* expression, that defines cells where  
209 the CRISPR-p53 axis is active.

210

## 211 **Methods**

212 Methods, including statements of data availability and any associated accession codes and  
213 references, are available as supplemental methods.

214

## 215 **Acknowledgments**

216 We are grateful to Drs. Robert M. Anthony, Kate Jeffrey, Eduardo Villablanca, and Bernhard  
217 Schmierer for their critical review of the manuscript, as well as to Drs. Michael Sundström,  
218 Lars Klareskog, Rasmus O. Bak, Alexander Espinosa, Klas G. Wiman, Lisa Westerberg, and  
219 Richard Rosenquist Brandell for important suggestions. psPAX2 (Addgene plasmid 12260) and  
220 pMD2.G (Addgene plasmid 12259) were kind gifts from Dr. Didier Trono. The ER-Hoxb8, and  
221 EcoPac plasmids were kind gifts from Dr. Mark P. Kamps. The R-script used to represent  
222 individual sgRNAs in Fig. S4a-b was a kind gift from Dr. Eric Shifrut. This work benefitted  
223 from data assembled by the DepMap Consortium for which we are grateful. The authors  
224 acknowledge support from the National Genomics Infrastructure in Stockholm funded by  
225 Science for Life Laboratory, the Knut and Alice Wallenberg Foundation and the Swedish  
226 Research Council, and SNIC/Uppsala Multidisciplinary Center for Advanced Computational  
227 Science for assistance with massively parallel sequencing and access to the UPPMAX  
228 computational infrastructure. This research was partly funded by grants from the Swedish  
229 Research Council (FW and DPL), the Swedish Cancer Society, Karolinska Institutet, Åke  
230 Olssons stiftelse (to FW), the China Scholarship Council (LJ and YS), and the Nanyang  
231 Technological University–Karolinska Institutet Joint PhD Programme (VSI).

232

## 233 **Author contributions**

234 LJ and FW designed experiments with input from KI, SS and DPL. LJ and KI performed  
235 experiments. LJ, KI, YS, SVB, VSI, ZK, SS, DPL, and FW analyzed the data. LJ, DPL, and  
236 FW wrote the manuscript. The final manuscript was read and approved by all the authors.

237

238 **Competing interest statement**

239 None declared.

240

241 **References**

- 242 1. Jinek, M., *et al.* A programmable dual-RNA-guided DNA endonuclease in adaptive bacterial  
243 immunity. *Science* **337**, 816-821 (2012).
- 244 2. Mali, P., *et al.* RNA-guided human genome engineering via Cas9. *Science* **339**, 823-826 (2013).
- 245 3. Cong, L., *et al.* Multiplex genome engineering using CRISPR/Cas systems. *Science* **339**, 819-  
246 823 (2013).
- 247 4. Kastan, M.B., Onyekwere, O., Sidransky, D., Vogelstein, B. & Craig, R.W. Participation of p53  
248 protein in the cellular response to DNA damage. *Cancer Res* **51**, 6304-6311 (1991).
- 249 5. Levine, A.J. p53, the cellular gatekeeper for growth and division. *Cell* **88**, 323-331 (1997).
- 250 6. Hollstein, M., Sidransky, D., Vogelstein, B. & Harris, C.C. p53 mutations in human cancers.  
251 *Science* **253**, 49-53 (1991).
- 252 7. Lane, D.P. Cancer. p53, guardian of the genome. *Nature* **358**, 15-16 (1992).
- 253 8. Vousden, K.H. & Lane, D.P. p53 in health and disease. *Nat Rev Mol Cell Biol* **8**, 275-283 (2007).
- 254 9. Porteus, M.H. A New Class of Medicines through DNA Editing. *N Engl J Med* **380**, 947-959  
255 (2019).
- 256 10. Frangoul, H., *et al.* CRISPR-Cas9 Gene Editing for Sickle Cell Disease and beta-Thalassemia.  
257 *N Engl J Med* (2020).
- 258 11. Ledford, H. CRISPR gene therapy shows promise against blood diseases. *Nature* **588**, 383  
259 (2020).
- 260 12. Esrick, E.B., *et al.* Post-Transcriptional Genetic Silencing of BCL11A to Treat Sickle Cell  
261 Disease. *N Engl J Med* **384**, 205-215 (2021).
- 262 13. Eyquem, J., *et al.* Targeting a CAR to the TRAC locus with CRISPR/Cas9 enhances tumour  
263 rejection. *Nature* **543**, 113-117 (2017).
- 264 14. Rupp, L.J., *et al.* CRISPR/Cas9-mediated PD-1 disruption enhances anti-tumor efficacy of  
265 human chimeric antigen receptor T cells. *Sci Rep* **7**, 737 (2017).
- 266 15. Doench, J.G., *et al.* Optimized sgRNA design to maximize activity and minimize off-target  
267 effects of CRISPR-Cas9. *Nat Biotechnol* **34**, 184-191 (2016).
- 268 16. Kleinstiver, B.P., *et al.* High-fidelity CRISPR-Cas9 nucleases with no detectable genome-wide  
269 off-target effects. *Nature* **529**, 490-495 (2016).
- 270 17. Tsai, S.Q., *et al.* GUIDE-seq enables genome-wide profiling of off-target cleavage by CRISPR-  
271 Cas nucleases. *Nat Biotechnol* **33**, 187-197 (2015).
- 272 18. Ihry, R.J., *et al.* p53 inhibits CRISPR-Cas9 engineering in human pluripotent stem cells. *Nat*  
273 *Med* **24**, 939-946 (2018).



- 274 19. Haapaniemi, E., Botla, S., Persson, J., Schmierer, B. & Taipale, J. CRISPR-Cas9 genome  
275 editing induces a p53-mediated DNA damage response. *Nat Med* **24**, 927-930 (2018).
- 276 20. Urnov, F.D. A path to efficient gene editing. *Nat Med* **24**, 899-900 (2018).
- 277 21. Merkle, F.T., *et al.* Human pluripotent stem cells recurrently acquire and expand dominant  
278 negative P53 mutations. *Nature* **545**, 229-233 (2017).
- 279 22. Xie, M., *et al.* Age-related mutations associated with clonal hematopoietic expansion and  
280 malignancies. *Nat Med* **20**, 1472-1478 (2014).
- 281 23. Chen, S., *et al.* Mutant p53 drives clonal hematopoiesis through modulating epigenetic pathway.  
282 *Nat Commun* **10**, 5649 (2019).
- 283 24. Bae, S., Park, J. & Kim, J.S. Cas-OFFinder: a fast and versatile algorithm that searches for  
284 potential off-target sites of Cas9 RNA-guided endonucleases. *Bioinformatics* **30**, 1473-1475  
285 (2014).
- 286 25. Karpnich, N.O., Tafani, M., Rothman, R.J., Russo, M.A. & Farber, J.L. The course of  
287 etoposide-induced apoptosis from damage to DNA and p53 activation to mitochondrial release  
288 of cytochrome c. *J Biol Chem* **277**, 16547-16552 (2002).
- 289 26. Canon, J., *et al.* The MDM2 Inhibitor AMG 232 Demonstrates Robust Antitumor Efficacy and  
290 Potentiates the Activity of p53-Inducing Cytotoxic Agents. *Mol Cancer Ther* **14**, 649-658  
291 (2015).
- 292 27. Bunz, F., *et al.* Requirement for p53 and p21 to sustain G2 arrest after DNA damage. *Science*  
293 **282**, 1497-1501 (1998).
- 294 28. Bowden, A.R., *et al.* Parallel CRISPR-Cas9 screens clarify impacts of p53 on screen  
295 performance. *Elife* **9**(2020).
- 296 29. Li, W., *et al.* MAGeCK enables robust identification of essential genes from genome-scale  
297 CRISPR/Cas9 knockout screens. *Genome Biol* **15**, 554 (2014).
- 298 30. Boehm, J.S. & Golub, T.R. An ecosystem of cancer cell line factories to support a cancer  
299 dependency map. *Nat Rev Genet* **16**, 373-374 (2015).
- 300 31. Meyers, R.M., *et al.* Computational correction of copy number effect improves specificity of  
301 CRISPR-Cas9 essentiality screens in cancer cells. *Nat Genet* **49**, 1779-1784 (2017).
- 302 32. Yu, C., *et al.* High-throughput identification of genotype-specific cancer vulnerabilities in  
303 mixtures of barcoded tumor cell lines. *Nat Biotechnol* **34**, 419-423 (2016).
- 304 33. Geisinger, J.M. & Stearns, T. CRISPR/Cas9 treatment causes extended TP53-dependent cell  
305 cycle arrest in human cells. *Nucleic Acids Res* **48**, 9067-9081 (2020).
- 306 34. Brown, K.R., Mair, B., Soste, M. & Moffat, J. CRISPR screens are feasible in TP53 wild-type  
307 cells. *Mol Syst Biol* **15**, e8679 (2019).
- 308 35. Cuella-Martin, R., *et al.* 53BP1 Integrates DNA Repair and p53-Dependent Cell Fate Decisions  
309 via Distinct Mechanisms. *Mol Cell* **64**, 51-64 (2016).

- 310 36. Bell, D.W., *et al.* Heterozygous germ line hCHK2 mutations in Li-Fraumeni syndrome. *Science*  
311 **286**, 2528-2531 (1999).
- 312 37. Choi, M., Kipps, T. & Kurzrock, R. ATM Mutations in Cancer: Therapeutic Implications. *Mol*  
313 *Cancer Ther* **15**, 1781-1791 (2016).
- 314 38. Vo, Q.N., *et al.* The ATM gene is a target for epigenetic silencing in locally advanced breast  
315 cancer. *Oncogene* **23**, 9432-9437 (2004).
- 316 39. Cazier, J.B., *et al.* Whole-genome sequencing of bladder cancers reveals somatic CDKN1A  
317 mutations and clinicopathological associations with mutation burden. *Nat Commun* **5**, 3756  
318 (2014).
- 319 40. Oliner, J.D., Kinzler, K.W., Meltzer, P.S., George, D.L. & Vogelstein, B. Amplification of a  
320 gene encoding a p53-associated protein in human sarcomas. *Nature* **358**, 80-83 (1992).
- 321 41. Momand, J., Jung, D., Wilczynski, S. & Niland, J. The MDM2 gene amplification database.  
322 *Nucleic Acids Res* **26**, 3453-3459 (1998).
- 323 42. Bulavin, D.V., *et al.* Amplification of PPM1D in human tumors abrogates p53 tumor-suppressor  
324 activity. *Nat Genet* **31**, 210-215 (2002).
- 325 43. Riemenschneider, M.J., *et al.* Amplification and overexpression of the MDM4 (MDMX) gene  
326 from 1q32 in a subset of malignant gliomas without TP53 mutation or MDM2 amplification.  
327 *Cancer Res* **59**, 6091-6096 (1999).
- 328 44. Daizumoto, K., *et al.* A DDX31/Mutant-p53/EGFR Axis Promotes Multistep Progression of  
329 Muscle-Invasive Bladder Cancer. *Cancer Res* **78**, 2233-2247 (2018).
- 330 45. Song, M.S., *et al.* The deubiquitinylation and localization of PTEN are regulated by a HAUSP-  
331 PML network. *Nature* **455**, 813-817 (2008).
- 332 46. Schirotti, G., *et al.* Precise Gene Editing Preserves Hematopoietic Stem Cell Function following  
333 Transient p53-Mediated DNA Damage Response. *Cell Stem Cell* **24**, 551-565 e558 (2019).
- 334 47. Donehower, L.A., *et al.* Integrated Analysis of TP53 Gene and Pathway Alterations in The  
335 Cancer Genome Atlas. *Cell Rep* **28**, 1370-1384 e1375 (2019).
- 336 48. Ferrari, S., *et al.* Efficient gene editing of human long-term hematopoietic stem cells validated  
337 by clonal tracking. *Nat Biotechnol* **38**, 1298-1308 (2020).

338

339

## 1 **Online Methods**

2

### 3 **Cells**

4 The Hox bone marrow cell line was generated by transducing bone marrow cells of C57BL/6  
5 Cas9+ GFP+ mice (The Jackson Laboratory, #026179) with an estrogen inducible retroviral  
6 construct expressing HoxB8 (ER-Hoxb8, a kind gift from Mark P. Kamps, University of  
7 California, San Diego) as described in<sup>1,2</sup>. Cells were cultured in 1  $\mu$ M  $\beta$ -estradiol (BE, Sigma-  
8 Aldrich #E2758) and 25 nM mouse Stem Cell Factor (SCF, Peprotech #250-03) for several  
9 weeks with HoxB8 expression turned on to establish a cell line like population. Hox cells were  
10 cultured in RPMI-1640 (Sigma-Aldrich #R0883) with 10% heat-inactivated fetal bovine serum,  
11 1% penicillin-streptomycin-glutamine (Gibco #10378016), 1  $\mu$ M BE, and 25 nM SCF.

12 B16-F10 cell is a mouse melanoma cell line, purchased from ATCC (#CRL6475) and used  
13 at a low passage number. Cas9 expressing cells were generated by transducing B16-F10 cells  
14 with lentiCas9-Blast (Addgene #52962) lentiviral particles. B16 cells were cultured in RPMI-  
15 1640 (Sigma-Aldrich #R0883) with 10% heat-inactivated fetal bovine serum, and 1%  
16 penicillin-streptomycin-glutamine (Gibco #10378016)

17

### 18 **Viral preparation and transduction**

19 Lentiviral particles were generated by seeding  $2 \times 10^6$  HEK293T cells in 10 cm plate in 10 ml  
20 of DMEM (Sigma-Aldrich #D6546) with 10% heat-inactivated fetal bovine serum and 1% L-  
21 glutamine (Gibco #A2916801). After ~24 h of culture, the cells reached ~60-70% confluency,  
22 and the medium was replaced by 5 ml of prewarmed fresh media. Transfer plasmids (lentiCas9-  
23 Blast, Addgene #52962; or LentiGuide-Puro-P2A-EGFP\_mRFPstuf, Addgene #137730),  
24 pMD2.G (Addgene #12259), and psPAX2 (Addgene #12260) were mixed at 4:5:1 ratio (10  $\mu$ g :  
25 12.5  $\mu$ g : 2.5  $\mu$ g for 10 cm plate), and transfected into HEK293T cells using Lyovec (Invivogen  
26 #lyec) according to the manufacturer's protocol. After 12 h, the medium was replaced by 8 ml  
27 of DMEM with 30% heat-inactivated fetal bovine serum and 1% L-glutamine. After another 36  
28 h, the supernatant containing the virus was collected and centrifuged to remove the cell debris  
29 and used to spin infect cells.

30 For ER-Hoxb8 retrovirus preparation, plasmids including ER-Hoxb8 and the EcoPac gag-  
31 pol-env plasmid (both are kind gifts from Mark P. Kamps, University of California, San Diego)  
32 were mixed at 1:1 ratio (12  $\mu$ g:12  $\mu$ g for 10 cm plate) for transfection into HEK293T following  
33 the same approach as for generating lentiviral particles.

34 To transduce Hox or B16 cells with LentiGuide-Puro-P2A-EGFP\_mRFPstuf, the  
35 multiplicity of infection (MOI) of the viral particles was tested by infection with serial dilutions  
36 of virus particles, to find a dilution resulting in a suitable MOI described below. Virus  
37 supernatant was added to each well of 6-well plate containing cells ( $4 \times 10^5$  for Hox cells with  
38 SCF and BE, and  $1 \times 10^5$  for B16 cells) with 8  $\mu\text{g}/\text{ml}$  polybrene (Sigma-Aldrich #H9268). The  
39 plate was centrifuged at  $37^\circ\text{C}$ , 1200g (120 min for Hox cells, and 45 min for B16 cells). After  
40 24h, the virus-containing medium was replaced with fresh medium, and the infection rate was  
41 measured by the percentage of GFP+ cells if the vector contains GFP. Puromycin (Invivogen  
42 #ant-pr) selection (10  $\mu\text{g}/\text{ml}$  for HoxB8 cells, and 5 $\mu\text{g}/\text{ml}$  for B16 cells) or Blasticidin  
43 (Invivogen #ant-bl) selection (10  $\mu\text{g}/\text{ml}$  for B16 cells) was performed for 24 h to remove the  
44 non-infected cells.

45

#### 46 **Electroporation and transfection**

47 sgRNAs were designed using the Green Listed software<sup>3,4</sup> using sgRNA design from the  
48 Doench mouse library<sup>5</sup>. 2'-O-methyl and phosphorothioate stabilized sgRNAs  
49 (**Supplementary Table 8**) were ordered from Sigma-Aldrich. Off-target activity was calculated  
50 using Cas-OFFinder (<http://www.rgenome.net/cas-offinder/>)<sup>6</sup>, and On-target activity was  
51 extracted from CHOPCHOP (<https://chopchop.cbu.uib.no/>)<sup>7</sup> by searching for Ccr1, or entering  
52 the EGFP FASTA sequence from the LentiGuide-Puro-P2A-EGFP\_mRFPstuf (Addgene  
53 #137730).

54 For Hox cells, Neon Transfection System (Invitrogen #MPK5000) was used to perform the  
55 electroporation following the manufacturer's instructions (Pulse voltage: 1700, Pulse width: 20  
56 ms, Pulse number: 1, for Hox cells). 100 pmol of sgRNA were electroporated into  $2 \times 10^5$  Hox  
57 cells for each electroporation experiment using Neon Transfection System 10  $\mu\text{L}$  Kit  
58 (Invitrogen #MPK1096). For B16 cells, Lipofectamine 2000 Transfection Reagent (Invitrogen,  
59 #11668019) was used following the recommended protocol. 100pmol of sgRNA were  
60 transfected into  $1 \times 10^5$  B16 cells for each transfection experiment.

61 Trp53 ON-TARGETplus siRNA SMARTPool was ordered from Horizon. For Hox cells,  
62 100 pmol of siRNA was electroporated into  $2 \times 10^5$  Hox cells for each electroporation  
63 experiment. For B16 cells, 100 pmol of siRNA was transfected into  $1 \times 10^5$  B16 cells for each  
64 transfection experiment. The Trp53 siRNA was typically delivered in the same reaction as the  
65 sgRNAs.

66

67 **CRISPR KO genotyping**

68  $1 \times 10^5$  cells were collected for genomic DNA extraction using DNeasy Blood & Tissue Kit  
69 (Qiagen #69504) following the recommended protocol. Primers (Sigma-Aldrich) were  
70 designed using Primer-BLAST (**Supplementary Table 8**), aiming for a 400-1000 bp amplicon  
71 with the sgRNA target in the middle. Amplicons were gel purified and recovered using  
72 Zymoclean Gel DNA Recovery Kit (Zymo Research #D4007/D4008). The PCR products were  
73 quantified using Nanodrop and sequenced by Eurofins Genomics. The Sanger sequencing data  
74 was subsequently analyzed by ICE (Synthego, <https://ice.synthego.com>).

75

76 **Growth curve characterization**

77 Hox cells were cultured with the following interventions: electroporation with a GFP targeting  
78 sgRNA; 0.5  $\mu\text{g/ml}$  Etoposide (Sigma-Aldrich #E1383); 3  $\mu\text{M}$  AMG232 (Axon Medchem  
79 #2639). The Etoposide and AMG232 were removed after 8 h by removing the medium and  
80 adding fresh medium without Etoposide or AMG232. The cells were cultured in 6 well plates  
81 with 4ml medium and passaged every day at the ratio of 1:3. 80  $\mu\text{l}$  of cells were taken every  
82 day for flow cytometry (BD Accuri) with the existence of CountBright Absolute Counting  
83 Beads (Invitrogen #C36950). The absolute viable cell number was calculated by comparing the  
84 events number of viable cells and counting beads in the flow cytometry data.

85

86 **Real-Time PCR**

87 TRIzol Reagent (Invitrogen #15596026) and Direct-zol RNA MiniPrep Kit (Zymo Research  
88 #R2051) was used to extract RNA. RNA was then converted into cDNA using High Capacity  
89 RNA-to cDNA kit (Applied Biosystem #4388950). The expression of Cdkn1a was quantified  
90 with a CFX 384 Real-Time PCR machine (Bio-Rad) using TaqMan gene expression FAM  
91 assays for Cdkn1a (Mm00432448\_m1) with the TaqMan Gene Expression Master Mix  
92 (Applied Biosystem #4369542) as suggested by the manufacturer. Expression was normalized  
93 by TaqMan gene expression VIC assays for  $\beta$ -actin (Mm00607939) and Gene expression was  
94 quantified using the ddCT method.

95

96 **Apoptosis TUNEL assay**

97 Cells were collected and fixed by PFA at different time point, and FlowTAC Apoptosis  
98 Detection Kit (R&D Systems #4817-60-K) was used to stain apoptotic cells following the  
99 manufacturer's instructions. Stained cells were analyzed by flow cytometry (BD Accuri).

100

## 101 **Cloning of sgRNAs into lentiviral transfer plasmid, and CRISPR screens**

102 sgRNAs with overhangs for the plasmids (**Supplementary Table 1**) were designed using the  
103 Green Listed software<sup>3,4</sup> using sgRNA design from the Doench mouse library<sup>5</sup> and, for  
104 intergenic controls, the Wang mouse library<sup>8</sup>. Individual sgRNAs were ordered from Sigma-  
105 Aldrich, and the sgRNA library was ordered from CustomArray as a DNA oligo pool. Cloning  
106 was performed using 150 ng of BsmBI (New England Biolabs #R0739) cleaved lentiGuide-  
107 Puro-P2A-EGFP\_mRFPstuf plasmid (Addgene #137730), and 10 ng of the library oligo pool,  
108 using NEBuilder HiFi DNA assembly master mix (New England Biolabs #E2621). Endura  
109 ElectroCompetent Cells (Lucigen #60242), were subsequently transformed with the cloned  
110 plasmid pool using electroporation (1.0 mm cuvette, 10  $\mu$ F, 600 Ohms, 1800 Volts) following  
111 the suggested protocol. The electroporated cells were combined and seeded on ten 20 cm LB  
112 agar plates with 100  $\mu$ g/ml carbenicillin and grown at 37°C overnight. The lentiGuide-Puro-  
113 P2A-EGFP\_mRFPstuf plasmid (Addgene #137730) makes bacteria red if the stuffer has not  
114 been exchanged by a sgRNA, and a few red clones were removed before collecting all other  
115 white clones. Then the plasmids were purified using EndoFree Plasmid Maxi Kit (Qiagen  
116 #12362).

117 The sgRNA cloned lentiGuide-Puro-P2A-EGFP\_mRFPstuf was used as transfer plasmid for  
118 lentiviral preparation and transduction. The total amount of transduced cells was calculated  
119 based on MOI (0.25 for B16 cells, and 0.05-0.1 for Hox cells, which were difficult to transduce),  
120 based on the % GFP+ cells before puromycin selection, aiming for 1000 transduced cells for  
121 each sgRNA.

122 The CRISPR library transduced cells were exposed to GFP targeting sgRNA electroporation  
123 with or without Trp53 siRNA, 0.5  $\mu$ g/ml Etoposide (Sigma-Aldrich #E1383) 8 h pulse  
124 stimulation, or 3  $\mu$ M AMG232 (Axon Medchem #2639) 8 h pulse stimulation.

125 Cells were collected for genomic DNA extraction using DNeasy Blood & Tissue Kit (Qiagen  
126 #69504). Genomic DNA was then amplified using Q5 High-Fidelity DNA Polymerase (New  
127 England Biolabs #M0491) while introduced sample-specific barcodes and adapters for Illumina  
128 Sequencing similar as described in Joung J et al.<sup>9</sup> using primers specified in **Supplementary**  
129 **Table 9**. The final PCR products were gel purified and recovered using Zymoclean Gel DNA  
130 Recovery Kit (Zymo Research #D4007/D4008), and quantified with Qubit 4 Fluorometer  
131 (Invitrogen #Q33238) using Qubit dsDNA HS Assay Kit (Invitrogen #Q32851) and pooled for  
132 next-generation sequencing (Illumina MiSeq v3 run, 2x75bp reads). The raw FASTQ data were  
133 analyzed by MAGeCK<sup>10</sup>. Read counts from CRISPR screens found in **Supplementary Table**  
134 **10-11**.

135 **JAK1/STAT1 signaling assay**

136 Hox cells were cultured with or without mouse Interferon Beta (IFN $\beta$ , Nordic BioSite #12405-  
137 1) and the Jak1 inhibitor Solcitinib (Selleckchem #S5917) for 7 days. Cells were passaged at  
138 the ratio of 1:8 every other day. 100  $\mu$ l of cells were taken on day 7 for flow cytometry (BD  
139 Accuri) with the existence of CountBright Absolute Counting Beads (Invitrogen #C36950). The  
140 absolute viable cell number was calculated by comparing the events number of viable cells and  
141 counting beads in the flow cytometry data.

142

143 **Competitive co-culture assay**

144 Trp53 KO and WT cells were mixed at 1:4 ratio, and were electroporated with sgRNA or  
145 transduced with lentivirus (lentiGuide-Puro-P2A-EGFP\_mRFPstuf) and cultured for 7 days; or  
146 cultured with Etoposide (Sigma-Aldrich, #E1383, 0.05  $\mu$ g/ml) or AMG232 (Axon Medchem  
147 #2639, 0.5  $\mu$ M for Hox cells, 4  $\mu$ M for B16 cells) for 7 days; or cultured with Cobalt(II) chloride  
148 (CoCl $_2$ , Sigma-Aldrich #232696, 10-20  $\mu$ g/ml) for 7 days. Different p53 related inhibitors were  
149 added during culture: Trp53 ON-TARGETplus siRNA SMARTPool (Horizon), KU55933  
150 (Sigma-Aldrich #SML1109, 100 ng/ml for B16, 10 ng/ml for Hox), VE821 (Sigma-Aldrich  
151 #SML1415, 50 ng/ml), Pifithrin- $\mu$  (Sigma-Aldrich #P0122, 2  $\mu$ g/ml for B16, 200 ng/ml for  
152 Hox), Cyclic Pifithrin- $\alpha$  (Sigma-Aldrich #P4236, 700 ng/ml for B16, 70 ng/ml for Hox), C646  
153 (Sigma-Aldrich, #SML0002, 1  $\mu$ g/ml), AZD2461 (Selleckchem #S7029, 250 ng/ml), LJI308  
154 (Sigma-Aldrich #SML1788, 2 ng/ml), Z-VAD-FMK (Selleckchem #S7023, 50  $\mu$ M). siRNA  
155 was delivered to cells 1 day before CRISPR/Etoposide/AMG232 exposure (100 pmol of siRNA  
156 electroporated into  $2 \times 10^5$  Hox cells, or transfected into  $1 \times 10^5$  B16 cells), or together with  
157 sgRNA for the transfection/electroporation groups. Other inhibitors were added to cell culture  
158 media 1 day before CRISPR/Etoposide/AMG232 exposure and cultured for 7 days. Cells were  
159 then collected for Trp53 KO genotyping. **Supplementary Table 7** further describes how stock  
160 solutions of inhibitors were generated and stored.

161

162 **Flow Cytometry Analysis**

163 Fresh bone marrow cells from C57BL/6 Cas9+ GFP+ mice and Hox cells were stained with the  
164 following antibodies: FITC Rat anti-Mouse CD34 (BD Biosciences #553733, 1:500), PE anti-  
165 mouse CD150 (BioLegend #115904, 1:200), PerCP/Cyanine5.5 anti-mouse Ly-6A/E  
166 (BioLegend #122524, 1:200), APC anti-mouse CD117 (BioLegend #105812, 1:500),  
167 APC/Cyanine7 anti-mouse CD16/32 (BioLegend #156612, 1:500), Biotin anti-mouse Lineage  
168 Panel (BioLegend #133307, 1:100), BV421 Streptavidin (BD Biosciences #563259, 1:1000),

169 LIVE/DEAD Fixable Aqua Dead Cell Stain Kit (Invitrogen #L34957, 1:2000). After 30 min of  
170 staining, the cells were washed and analyzed by flow cytometry (BD FACSVerser). FACS FCS  
171 files were analyzed by FlowJo version 10 (FlowJo, LLC).

172

### 173 **Analysis of data from the Depmap portal**

174 sgRNA enrichment (CRISPR (Avana) Public 20Q4 release), mutation profile (Mutation Public  
175 20Q4 release), drug sensitivity (PRISM Repurposing Primary Screen 19Q4 release), and  
176 mRNA expression levels (Expression Public 20Q4 release) was extracted December 13<sup>th</sup> 2020  
177 from the Depmap portal (<https://depmap.org/portal/>)<sup>11-13</sup>. Connectivity maps were generated  
178 using the geneMANIA plugin for Cytoscape<sup>14,15</sup>. tSNE plots were made with the Rtsne package  
179 (<https://github.com/jkrijthe/Rtsne>) to analyze the cluster and ggplot2  
180 (<https://github.com/tidyverse/ggplot2>) to visualize the data, or tSNE-online  
181 (<https://github.com/jefworks/tsne-online>). The “ENCODE and ChEA Consensus TFs from  
182 ChIP-X” functionality of Enrichr (<https://maayanlab.cloud/Enrichr/index.html>)<sup>16,17</sup> was used to  
183 identify transcription factor binding to gene sets.

184

### 185 **References**

- 186 1. Wang, G.G., *et al.* Quantitative production of macrophages or neutrophils ex vivo using  
187 conditional Hoxb8. *Nat Methods* **3**, 287-293 (2006).
- 188 2. Panda, S.K., *et al.* IL-4 controls activated neutrophil FcγR2b expression and  
189 migration into inflamed joints. *Proc Natl Acad Sci U S A* **117**, 3103-3113 (2020).
- 190 3. Panda, S.K., *et al.* Green listed-a CRISPR screen tool. *Bioinformatics* **33**, 1099-1100  
191 (2017).
- 192 4. Iyer, V.S., *et al.* Designing custom CRISPR libraries for hypothesis-driven drug target  
193 discovery. *Comput Struct Biotechnol J* **18**, 2237-2246 (2020).
- 194 5. Doench, J.G., *et al.* Optimized sgRNA design to maximize activity and minimize off-  
195 target effects of CRISPR-Cas9. *Nat Biotechnol* **34**, 184-191 (2016).
- 196 6. Bae, S., Park, J. & Kim, J.S. Cas-OFFinder: a fast and versatile algorithm that searches  
197 for potential off-target sites of Cas9 RNA-guided endonucleases. *Bioinformatics* **30**,  
198 1473-1475 (2014).
- 199 7. Labun, K., *et al.* CHOPCHOP v3: expanding the CRISPR web toolbox beyond genome  
200 editing. *Nucleic Acids Res* **47**, W171-W174 (2019).
- 201 8. Wang, T., *et al.* Gene Essentiality Profiling Reveals Gene Networks and Synthetic  
202 Lethal Interactions with Oncogenic Ras. *Cell* **168**, 890-903 e815 (2017).
- 203 9. Joung, J., *et al.* Genome-scale CRISPR-Cas9 knockout and transcriptional activation  
204 screening. *Nat Protoc* **12**, 828-863 (2017).
- 205 10. Li, W., *et al.* MAGECK enables robust identification of essential genes from genome-  
206 scale CRISPR/Cas9 knockout screens. *Genome Biol* **15**, 554 (2014).
- 207 11. Dempster, J.M., *et al.* Extracting Biological Insights from the Project Achilles Genome-  
208 Scale CRISPR Screens in Cancer Cell Lines. *bioRxiv*, 720243 (2019).



- 209 12. Meyers, R.M., *et al.* Computational correction of copy number effect improves  
210 specificity of CRISPR-Cas9 essentiality screens in cancer cells. *Nat Genet* **49**, 1779-  
211 1784 (2017).
- 212 13. Ghandi, M., *et al.* Next-generation characterization of the Cancer Cell Line  
213 Encyclopedia. *Nature* **569**, 503-508 (2019).
- 214 14. Franz, M., *et al.* GeneMANIA update 2018. *Nucleic Acids Res* **46**, W60-W64 (2018).
- 215 15. Montojo, J., *et al.* GeneMANIA Cytoscape plugin: fast gene function predictions on the  
216 desktop. *Bioinformatics* **26**, 2927-2928 (2010).
- 217 16. Chen, E.Y., *et al.* Enrichr: interactive and collaborative HTML5 gene list enrichment  
218 analysis tool. *BMC Bioinformatics* **14**, 128 (2013).
- 219 17. Kuleshov, M.V., *et al.* Enrichr: a comprehensive gene set enrichment analysis web  
220 server 2016 update. *Nucleic Acids Res* **44**, W90-97 (2016).

221

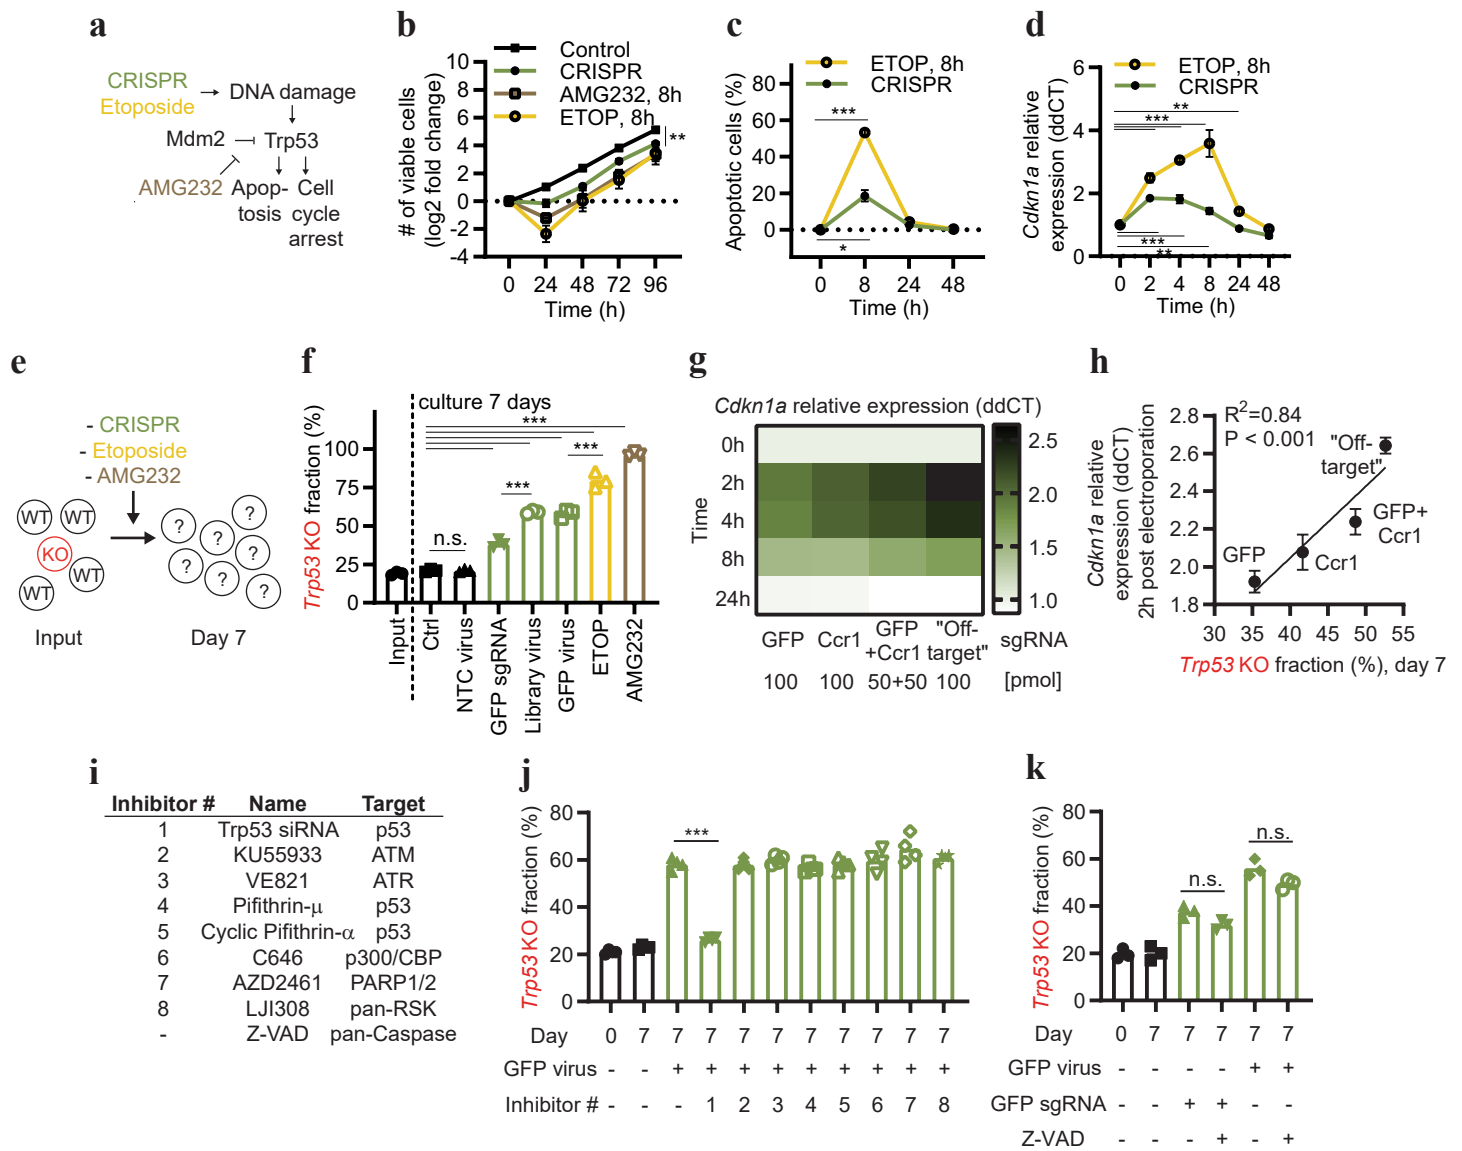

**Figure 1. CRISPR-mediated DNA damage enriches for cells with mutations in Trp53, and this can be inhibited.** (a) Model describing how CRISPR and the used drugs are expected to affect targeted cells. (b) Growth characteristics of Hox expanded bone marrow cells (from Cas9+ GFP+ mice), exposed to CRISPR (electroporated with a GFP sgRNA, or control), or pulsed for 8h with AMG232, or Etoposide (ETOP). (c) Kinetic analysis of apoptosis by flow cytometry-based TUNEL assay of Hox cells exposed to CRISPR (electroporated with GFP sgRNA) or ETOP. (d) Kinetic qPCR analysis of *Cdkn1a* expression of Hox cells exposed to CRISPR (electroporated with GFP sgRNA) or ETOP. (e) Model describing experimental setup. (f) WT and Trp53 KO Hox cells (Cas9+ and GFP+) were mixed and subjected to CRISPR (electroporated with a GFP sgRNA, non-targeting ctrl (NTC) virus, CRISPR library virus, or GFP targeting sgRNA virus), or an 8h pulse with ETOP or AMG232. After seven days in culture, cells were sequenced, and the fraction of Trp53 KO sequences determined. (g) Hox cells (Cas9+ and GFP+) were electroporated with indicated sgRNAs, and *Cdkn1a* expression was analyzed by qPCR at different time points as indicated in figure. (h) Comparison of the *Cdkn1a* expression by qPCR 2h post electroporation with indicated sgRNAs, and enrichment of Trp53 KO sequences day seven. (i) Inhibitors used in (j-k). (j) WT and Trp53 KO Hox cells (Cas9+ and GFP+) were mixed and transduced with a GFP targeting sgRNA virus in the presence of inhibitors. Cells were then cultured for seven days, followed by sequencing of Trp53, and the frequency of Trp53 mutations quantified. (k) WT and Trp53 KO Hox cells (Cas9+ and GFP+), were mixed and transduced with a GFP targeting sgRNA virus or electroporated with a GFP sgRNA in the presence of the caspase inhibitor Z-VAD. Cells were then cultured for seven days, followed by sequencing of Trp53, and the frequency of Trp53 mutations quantified. Data is shown as mean  $\pm$  SEM,  $n=3$  (b-d, h), mean and individual values,  $n=3-4$  (f, j-k), or heatmap based on the average signal,  $n=3$  (g). Data is representative of two or more experiments. n.s. = non-significant, \* =  $p < 0.05$ , \*\* =  $p < 0.01$ , \*\*\* =  $p < 0.001$  by two-way ANOVA and Tukey's post-test (b-d), one-way ANOVA and Tukey's post-test (f, j-k), or Pearson  $r$  correlation and simple linear regression line (h).

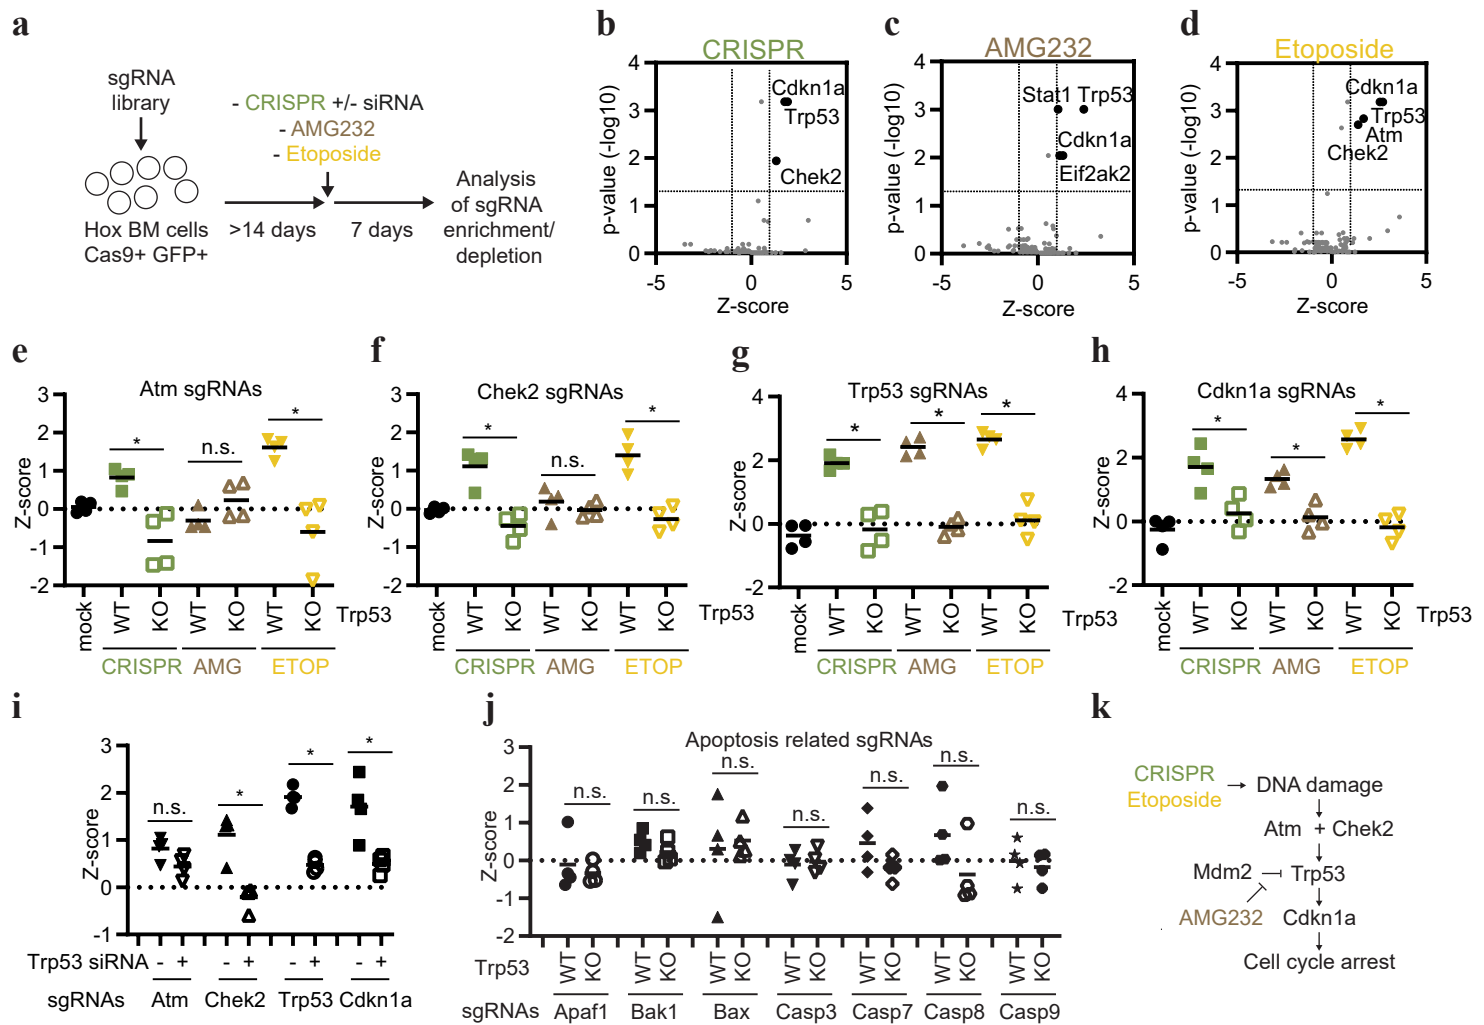

**Figure 2. CRISPR enriches for low-frequency mutations in tumor suppressor genes.** (a) Model describing experimental setup. (b-d) Hox cells (Cas9+ and GFP+) were transduced with a custom CRISPR library and cultured for >14 days. Cells were then either exposed to CRISPR (GFP targeting sgRNA) (b), AMG232 8h pulse (c), or Etoposide 8h pulse (d). Cells were cultured for seven days and then the sgRNA representation was analyzed by next-generation sequencing, and enrichment/depletion deconvoluted by MAGeCK. (e-h) Z-scores of individual sgRNAs (n=4/gene) for Atm (e), Chek2 (f), Trp53 (g), and Cdkn1a (h) in WT and Trp53 KO Hox cells treated with mock (electroporation without sgRNA), CRISPR (electroporation with GFP targeting sgRNA), AMG232 or ETOP. (i) Z-scores of individual sgRNAs (n=4/gene) in Hox cells treated with Trp53 siRNA at the same time as being electroporated with a GFP targeting sgRNA as described in (a). (j) Z-scores of individual sgRNAs (n=4/gene) for genes linked to apoptosis. (k) Model indicating genes playing a non-redundant role in the DNA damage response. Data presented as volcano plots with Z-score (log2 fold change) and adjusted p-values (b-d), or mean and individual values for 4 gRNAs from the exploratory screen (e-j). \* = P < 0.05, and n.s. = non-significant by Mann-Whitney test.

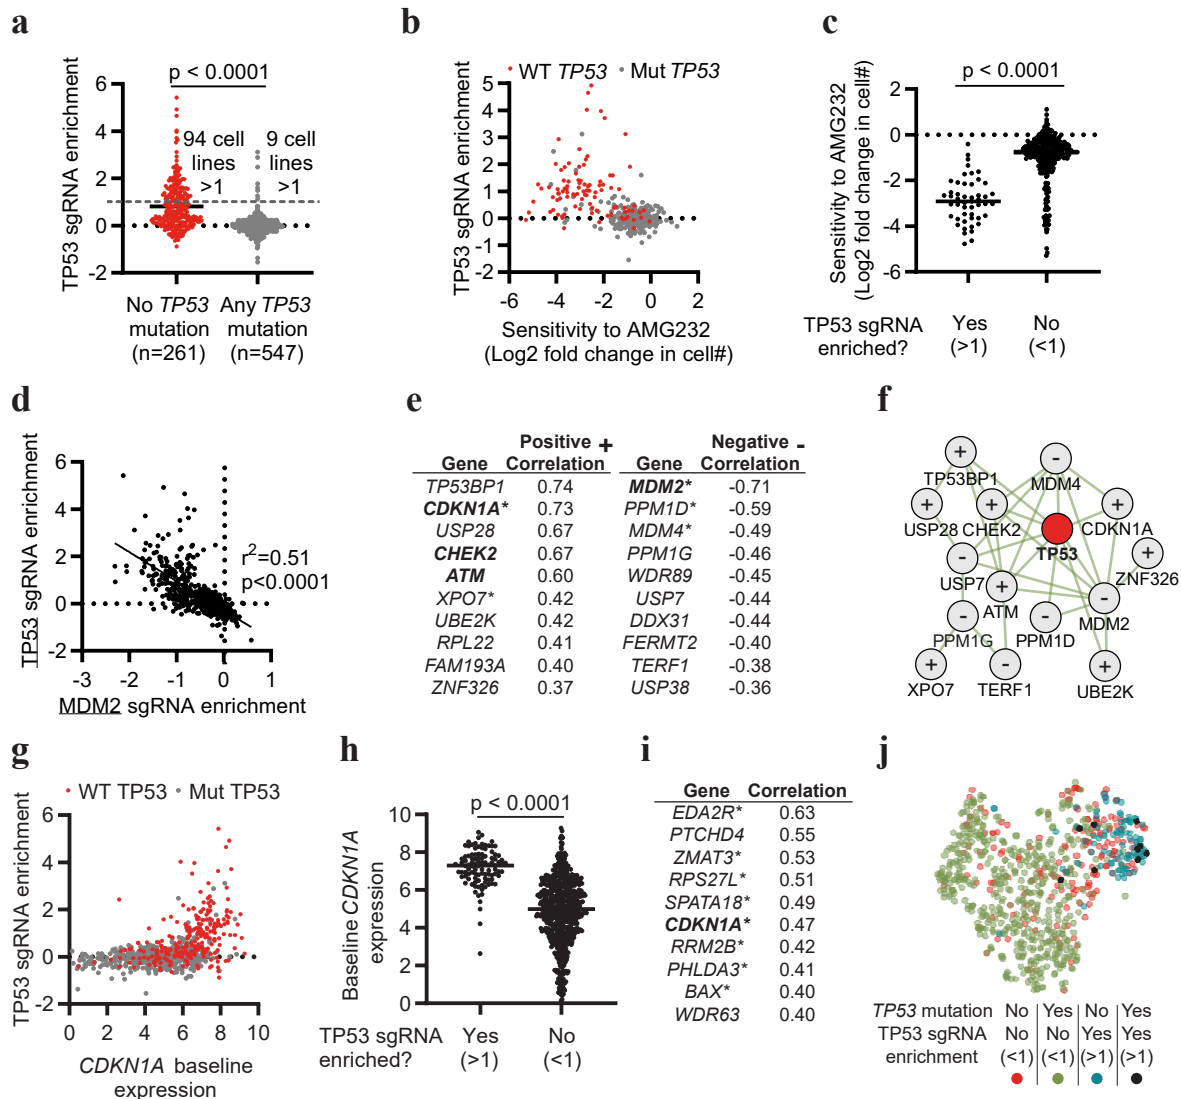

**Figure 3. Enrichment of TP53 sgRNAs in full genome CRISPR screens of human cancer cell lines.** (a) Enrichment score of TP53 gRNAs in 808 cell lines, stratified based on the presence or absence of any mutation in TP53. (b) Correlation between the enrichment of TP53 sgRNAs and AMG232 sensitivity. TP53 WT cells are indicated in red. (c) Sensitivity to AMG232 in cell lines stratified based on TP53 sgRNA enrichment. (d) Correlation between the enrichment of TP53 sgRNAs and MDM2 sgRNAs. (e) Top 10 genes with the strongest positive (+) and negative (-) correlation with TP53 sgRNA enrichment from full genome CRISPR screens of 808 cell lines. \* indicates genes identified as transcription factor target genes for p53 identified by Enricher. Bold indicates genes identified experimentally in figure 2. (f) Physical interactions of genes in (e) defined by geneMANIA. + indicates genes that positively correlate, and - indicates genes that negatively correlate with TP53 sgRNA enrichment. (g) Correlation of TP53 sgRNA enrichment to baseline CDKN1A expression. TP53 WT cells are indicated in red. (h) Baseline CDKN1A expression in cells stratified based on the enrichment of TP53 sgRNAs. (i) Top 10 genes with expression correlating with enrichment of TP53 sgRNAs. \* indicates genes identified as transcription factor target genes for p53. (j) tSNE dimensionality reduction analysis of cell, n=808, based on expression of the ten genes in (i). Data includes all available data in the Depmap CRISPR (Avana) 20Q4, Expression Public 20Q4, as well as Drug sensitivity (PRISM Repurposing Primary Screen) 19Q4 releases. Each dot represents one cell line (a-d, g, h, j), and the data is based on n=808 (a, d-f) n=408 (b-c), n=800 (g-j). Statistic based on unpaired T-test (a, c, h), Pearson r correlation and simple linear regression line (d), and calculated in Depmap (e, i).

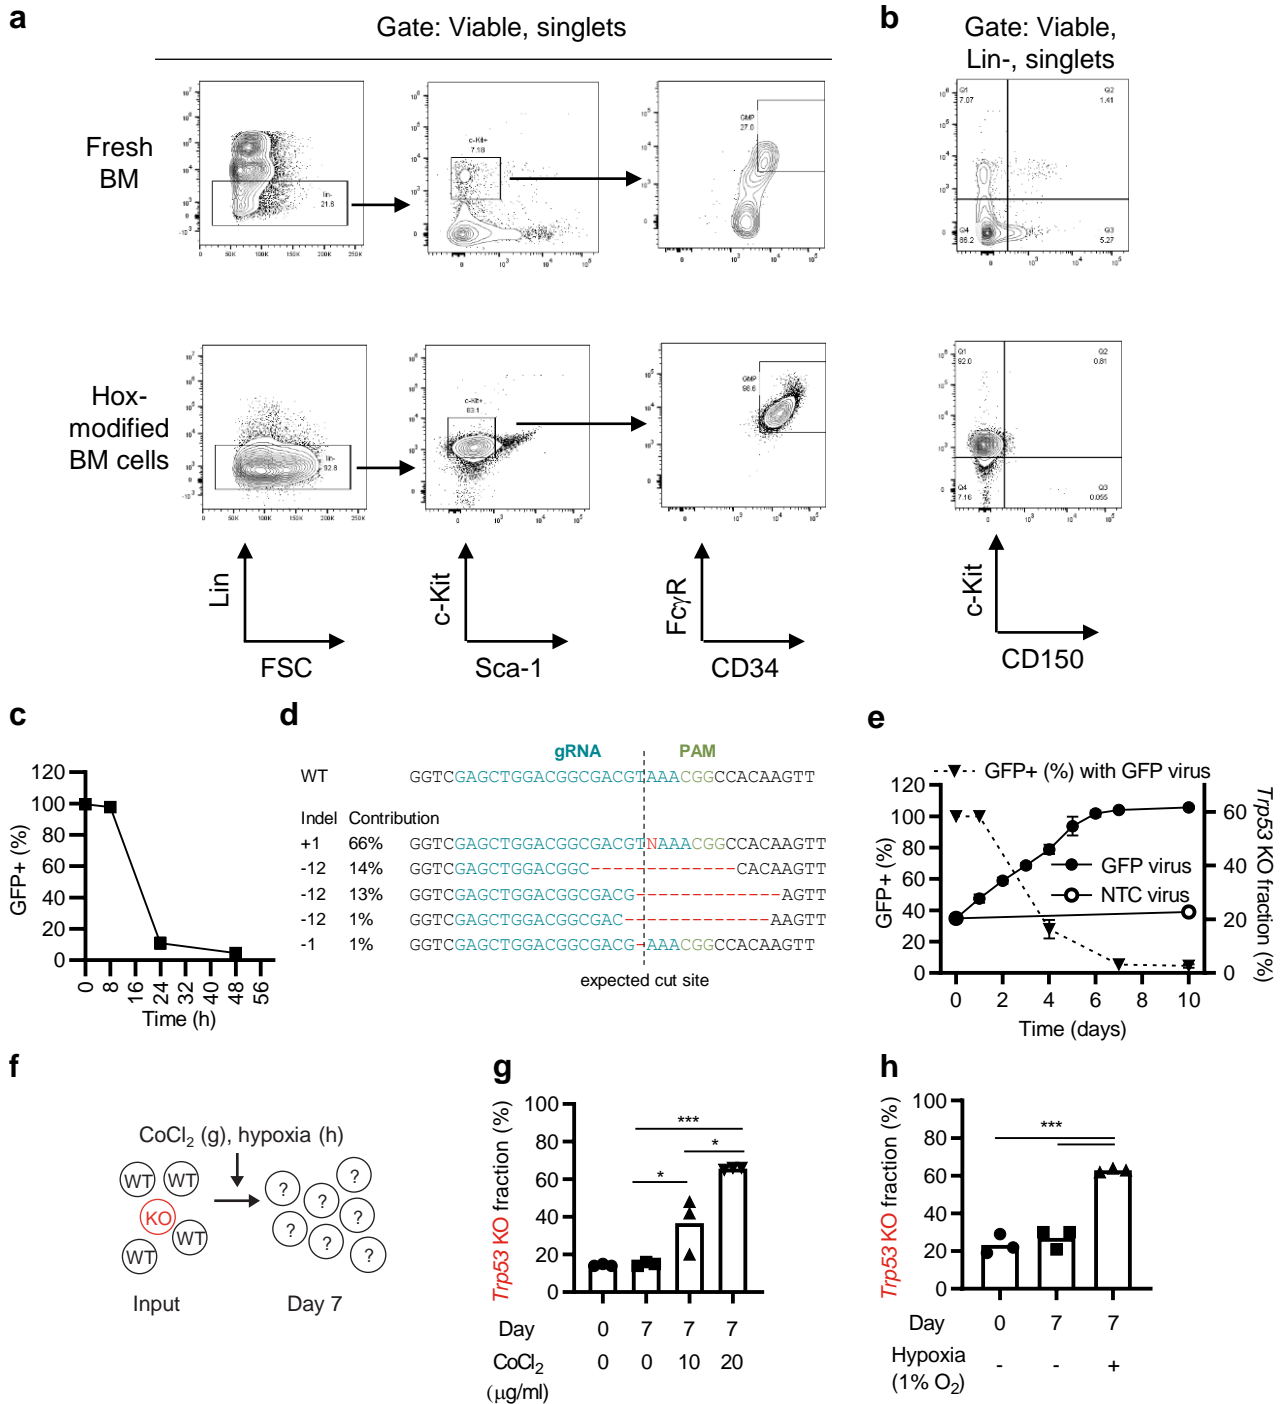

**Supplementary Figure 1. Hox cells, CRISPR-mediated GFP inactivation, and hypoxia.**

(a-b) Flow cytometry analysis of fresh bone marrow (BM) and Hox expanded BM cells from C57BL/6 Cas9<sup>+</sup> GFP<sup>+</sup> mice. Hox cells display a Granulocyte-Monocyte Progenitor (GMP) phenotype (Lin<sup>-</sup>, c-kit<sup>+</sup>, Sca-1<sup>-</sup>, FcγR<sup>+</sup>, CD34<sup>+</sup>, CD150<sup>-</sup>). (c) Kinetic flow cytometer analysis of GFP signal of Hox cells electroporated with a GFP targeting sgRNA. (d) Sanger sequencing and ICE mutation analysis of the GFP targeted region in Hox cells 48h after electroporation of a GFP targeting sgRNA. (e) Kinetic flow cytometer analysis of GFP signal of Hox cells transduced with lentiviral particles carrying a GFP targeting sgRNA. Triangles indicate the kinetics of GFP KO (left y-axis), showing a substantially slower dynamics compared to sgRNA electroporation in (c). Circles indicate the kinetics of the enrichment of Trp53 KO cells (right y-axis). (f-h) WT and Trp53 KO Hox cells were mixed and cultured for seven days in the presence of different concentrations of Cobalt Chloride (CoCl<sub>2</sub>) that stabilizes hypoxia-inducible factor-1α (g) or in a hypoxia chamber (h). Data presented as mean ± SEM, n=3 (c, e), or mean and individual values (g-h). Data is representative of two or more experiments.

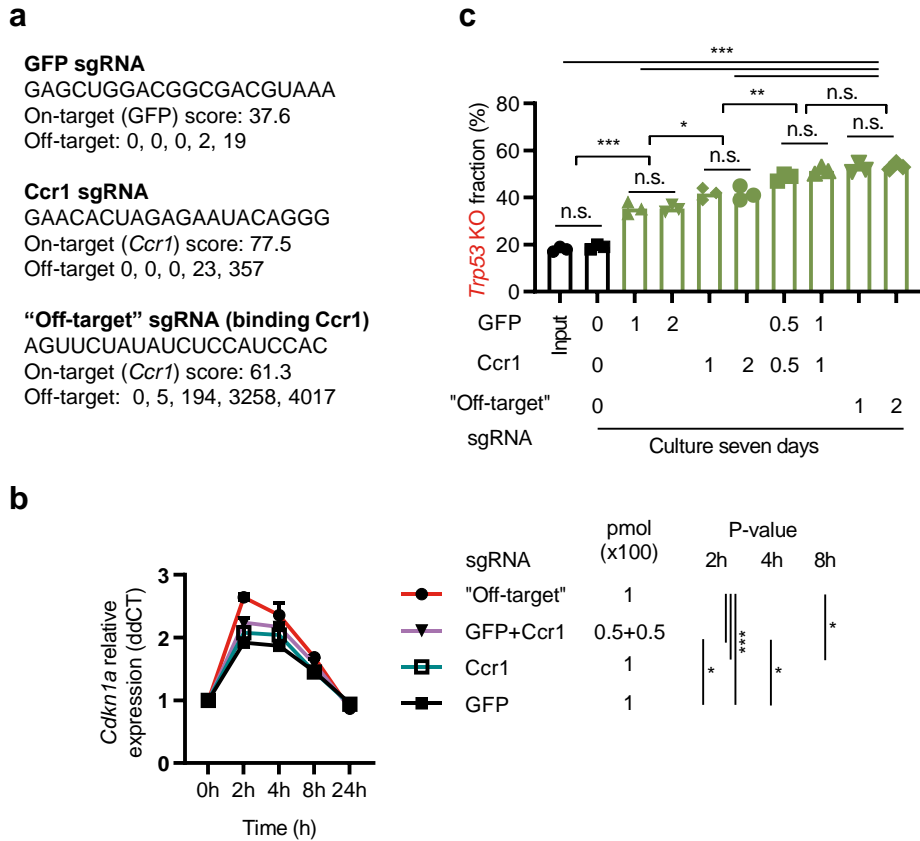

**Supplementary Figure 2. The level of DNA damage induced by CRISPR affects the magnitude of enrichment of cells with *Trp53* mutations.** (a) Information about sgRNAs used in the figure. On-target score calculated by CHOPCHOP (PMID: 31106371). Off-target indicates number of targets with 0, 1, 2, 3, and 4 miss matches to the mouse genome as identified by Cas-OFFinder. (b) Hox cells (Cas9+ and GFP+) were electroporated by different sgRNAs at the indicated doses (pmol x 100), and cells collected for *Cdkn1a* qPCR (same data as shown in heatmap, Fig. 1g, but with quantification). (c) *Trp53* KO and WT Hox cells (Cas9+ and GFP+) were mixed 1:5 and electroporated by different sgRNAs at the indicated doses (pmol x 100). Seven days later cells were collected and sequenced to determine the % *Trp53* KO sequences. Data presented as mean +/- SEM, n=3 (b), or mean and individual data, n=3 (c). Data is representative of two or more experiments. \* = p < 0.05, \*\* = p < 0.01, \*\*\* = p < 0.001, and n.s. = non-significant by two-way ANOVA and Tukey's post-test (b), or one-way ANOVA and Tukey's post-test (c).

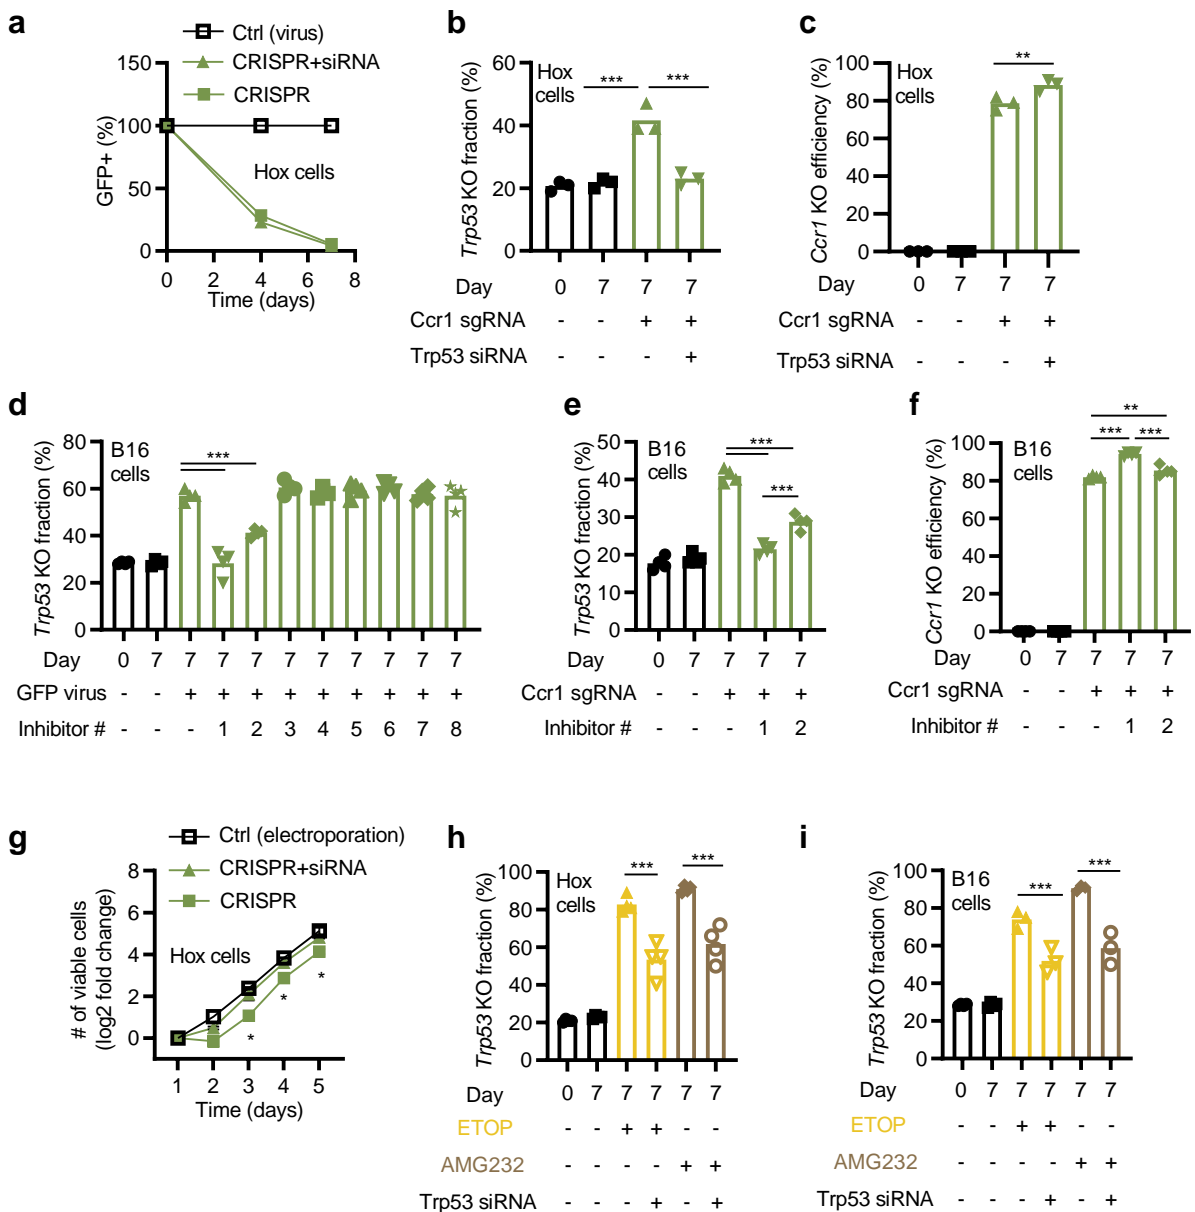

**Supplementary Figure 3. Transient inhibition of p53 limits enrichment of cells with mutations in *Trp53* while retaining, or increasing, the KO efficiency.** (a) Hox cells (Cas9+ and GFP+) were electroporated +/- *Trp53* siRNA and subsequently transduced with a virus carrying a GFP targeting sgRNA. The KO efficiency of GFP was followed over time by flow cytometry. (b) WT and *Trp53* KO Hox cells were mixed and electroporated with a *Ccr1* sgRNA +/- *Trp53* siRNA. Cells were cultured for seven days, followed by sequencing of *Trp53* to quantify the frequency of mutations. (c) The *Ccr1* knockout efficiency was measured by sequencing *Ccr1* in Hox cells treated as in (b). (d) WT and p53 KO B16 cells (Cas9+ and GFP+), were mixed and transduced with a GFP targeting sgRNA virus in the presence of a selection of inhibitors (see figure 1i-j for details). Inhibitor #1 = *Trp53* siRNA, #2 = KU55933 (an *Atm* inhibitor). Cells were then cultured for seven days, followed by sequencing of *Trp53*, and the frequency of *Trp53* mutations quantified. (e-f) Same experiment as (b-c), but with B16 cells. (g) Growth characteristics of Cas9+ GFP+ Hox cells electroporated with a GFP sgRNA +/- *Trp53* siRNA. (h-i) WT and *Trp53* KO Hox cells (h) or B16 cells (i) were mixed and incubated with an 8h pulse of ETOP or AMG232 in the presence or absence of *Trp53* siRNA. Data is shown as mean +/- SEM, n=3 (a, g), or mean and individual values, n=3-4 (b-c, d-f, h-i). Data is representative of two or more experiments. \*\* = P < 0.01, \*\*\* = P < 0.001 by one-way ANOVA and Tukey's post-test (b-c, d-f, h-i), or two-way ANOVA and Tukey's post-test (g, indicated significance relates to CRISPR +/- siRNA).

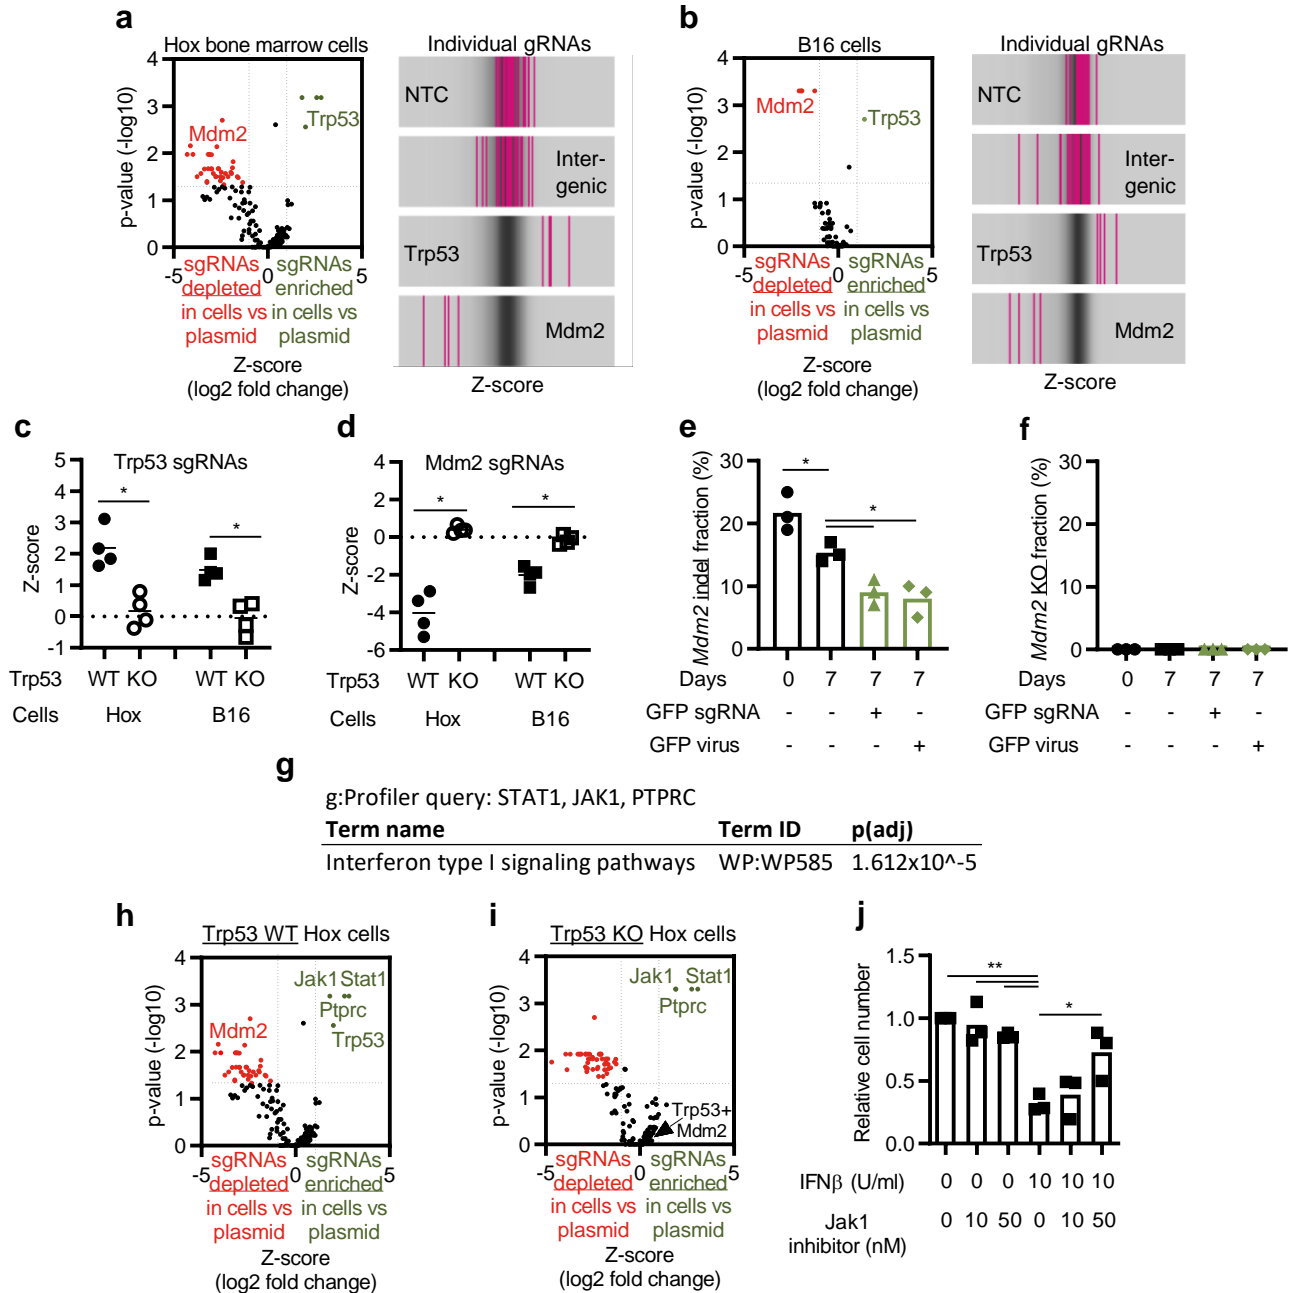

**Supplementary Figure 4. p53 and MDM2 play a central role in the CRISPR-mediated DNA damage response, and JAK1/STAT1 signaling negatively affects Hox cell survival independently of p53 status.**

(a-b) Exploratory CRISPR screen targeting 400 cell death-related genes and controls in Hox cells (a), and B16 cells (b). The sgRNA representation was analyzed by next-generation sequencing, and enrichment/depletion deconvoluted by MAGeCK. Genes (left) and individual sgRNAs of non-targeting controls (NTC), intergenic controls, Trp53, and Mdm2 (right) enriched and depleted after seven days by the CRISPR-induced DNA damage. (c-d) Enrichment and depletion of individual sgRNAs for Trp53 (c), and Mdm2 (d) in the CRISPR screen, comparing WT and Trp53 KO Hox and B16 cells. (e-f) Hox cells WT or with mutations (any Indels, including insertions and deletion of 3 nucleotides) in Mdm2 were mixed and exposed to CRISPR (sgRNA electroporation or sgRNA virus). Cells were cultured for seven days, followed by sequencing of Mdm2 to quantify the frequency of indels (e) and KO (f). (g) Top WP term identified by g:Profiler querying STAT1, JAK1, and PTPRC. (h-i) Enrichment of Jak1, Stat1, and Ptprc sgRNAs in Hox WT (h), and Hox Trp53 KO cells (i). (h) is the same data as (a), but indicating Jak1, Stat1, Ptprc. (j) Hox cells cultured for five days with type I interferon (IFN $\beta$ ) and Jak1 inhibitor. Data presented as relative cell number compared to the control (no IFN $\beta$  or Jak1 inhibitor). Data is presented as volcano plots with adjusted p-values ( $-\log_{10}$ ;  $>1.3 = p < 0.05$ ) and Z-score ( $\log_2$  fold enrichment/depletion of sgRNAs (a-b, g-h, adjusted p-value  $<0.05$ , and Z-score  $>1$  or  $<-1$  are indicated in color), or mean and individual values (c-f, j). \* =  $p < 0.05$ , and \*\* =  $p < 0.01$  by Mann-Whitney test (c, d), or one-way ANOVA and Turkey's post-test (e-f, j).



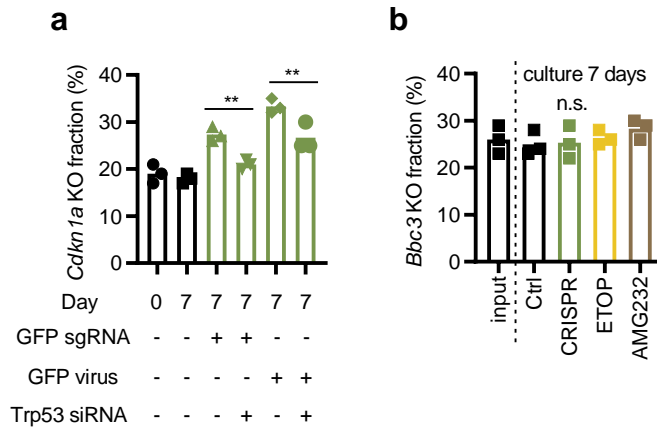

**Supplementary Figure 5. Enrichment of mutations in *Cdkn1a* but not *Bbc3* by CRISPR.** (a) WT and *Cdkn1a* KO Hox cells were mixed and electroporated with a GFP sgRNA +/- Trp53 siRNA. Cells were cultured for seven days, followed by sequencing of *Cdkn1a* to quantify the frequency of mutations. (b) WT and *Bbc3* KO Hox cells were mixed and electroporated with a GFP sgRNA, or exposed to a 8h pulse with Etoposide or AMG232. Cells were subsequently cultured for seven days, followed by sequencing of *Bbc3* to quantify the frequency of mutations. Data is presented as mean and individual values (pooled from three independent experiments) n.s. = non-significant, and \*\* =  $p < 0.01$  by one-way ANOVA and Turkey's post-test.

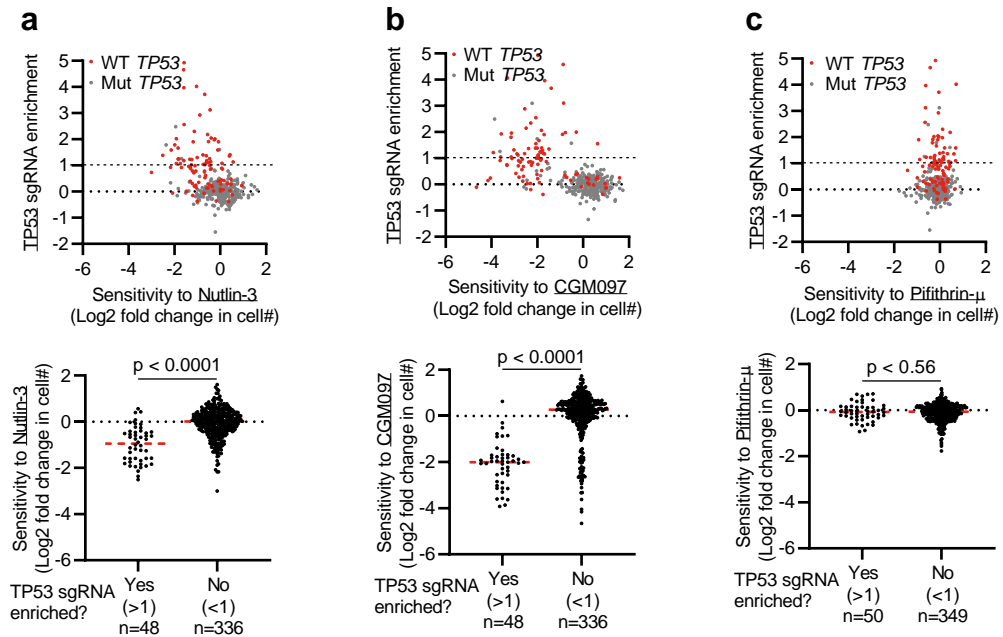

**Supplementary Figure 6. The sensitivity of cell lines to Nutlin-3, CMG097, and Pifithrin-m. (a-c)** TP53 sgRNA enrichment score from the Depmap, and sensitivity to Nutlin-3 (a), CMG097 (b), and Pifithrin-m (c). Sensitivity is defined as the number of cells after a five-day culture, compared to control-treated cells (log2 fold change). Upper graphs show both parameters and *TP53* mutation status (WT or mutated, Mut) indicated by color, lower graphs show sensitivity in cells stratified based on TP53 sgRNA enrichment. Data includes all available data in the Depmap CRISPR (Avana) 20Q4, Mutation Public 20Q4, and Drug sensitivity (PRISM Repurposing Primary Screen) 19Q4 releases. Each dot represents one cell line. Statistics based on unpaired T-test (a-c).

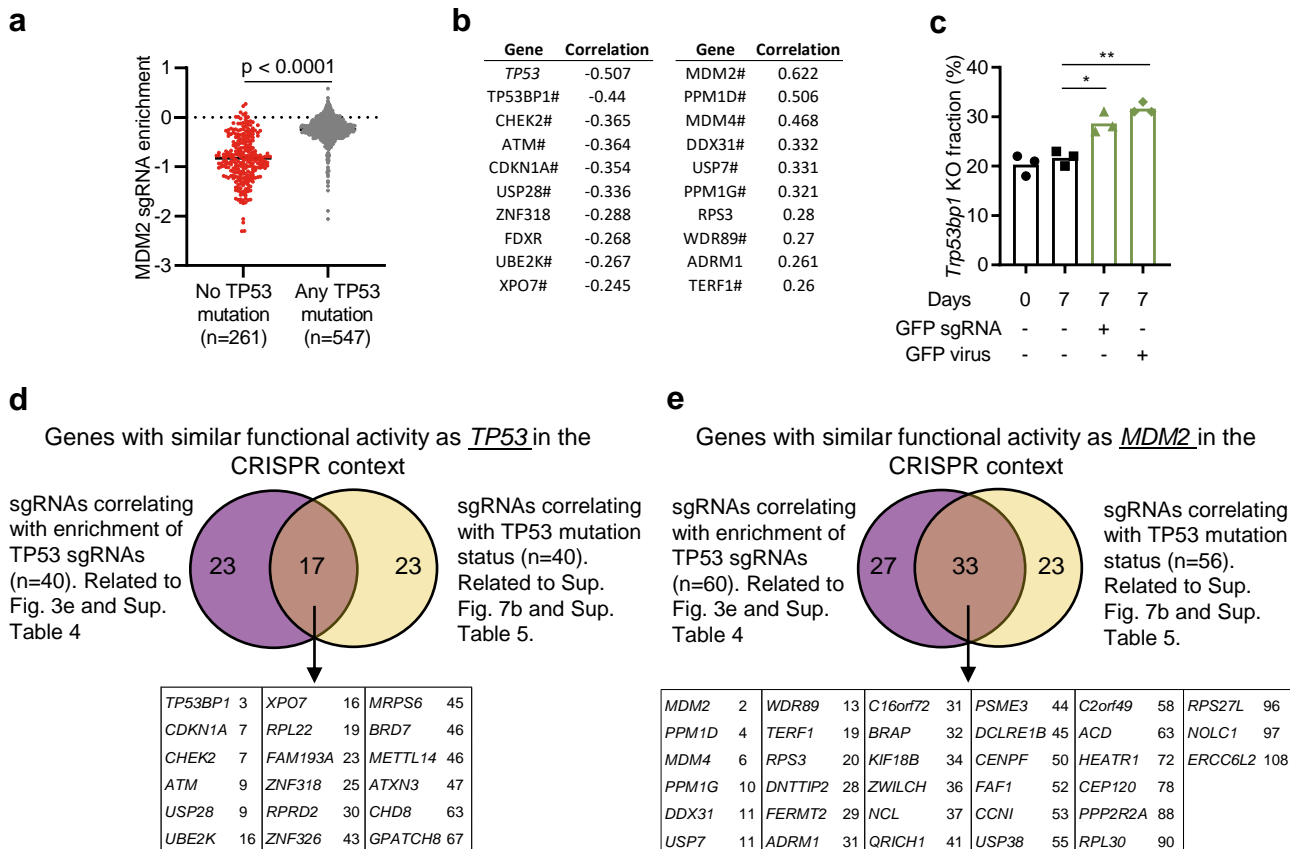

**Supplementary Figure 7. sgRNA enrichment/depletion that correlates with TP53 mutation status**

(a) MDM2 gRNA enrichment score stratified based on *TP53* mutation status. (b) Top ten negative and positive correlating genes comparing sgRNA enrichment in cells that are WT for *TP53* or that has any mutation in *TP53*. # indicates genes that overlap with the sgRNA correlation list in figure 3e. (c) WT and *Trp53bp1* KO Hox cells were mixed and electroporated with a GFP sgRNA or transduced with a virus carrying the same GFP sgRNA. Cells were cultured for seven days, followed by sequencing of *Trp53bp1* to quantify the frequency of mutations. (d-e) Venn diagram showing overlap of genes identified to correlate with the two different approaches, divided into genes that functionally behave similarly as *TP53* (d), and *MDM2* (e), in the CRISPR context. Overlapping genes are sorted based on the combined ranking of the two different approaches. Data includes all available data in the Depmap CRISPR Avana 20Q4, and Mutation Public 20Q4 releases. Each dot represents one cell line. Statistics based on unpaired T test (a), correlation calculated by Depmap (b), or one-way ANOVA and Tukey's post-test, \* =  $p < 0.05$ , \*\* =  $p < 0.01$  (c).

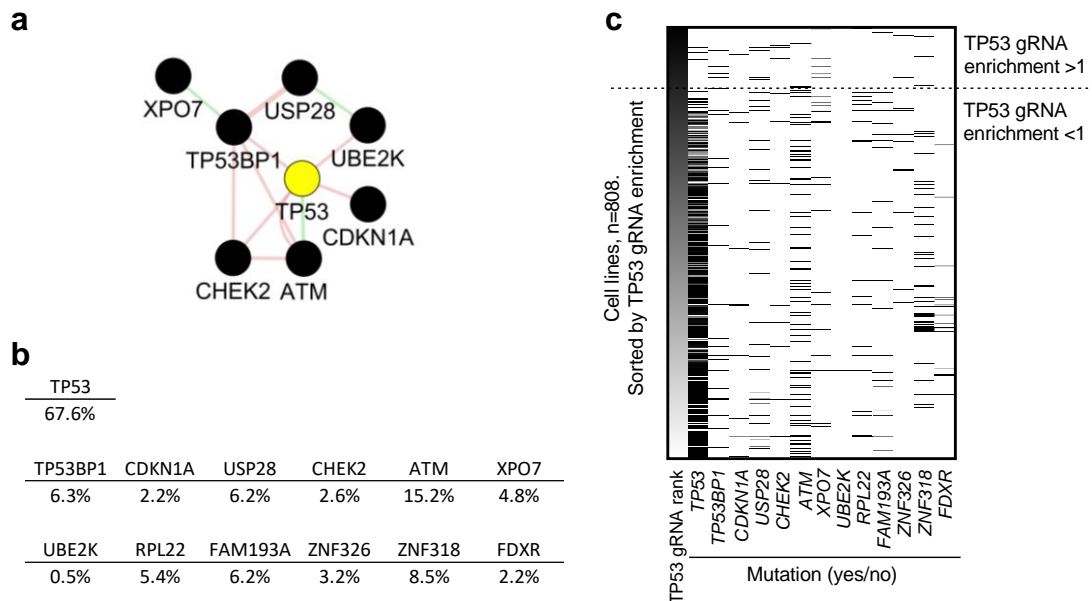

**Supplementary Figure 8. Mutation frequency in the core CRISPR-p53 tumor suppressor interactome.** (a) A core CRISPR-p53 tumor suppressor interactome based on experimental data and analysis of Depmap correlations related to TP53 gRNA enrichment and *TP53* mutation. Includes tumor suppressor genes overlapping in Fig. 3e and Supplementary Fig. 6b. Interactions identified by geneMANIA: Red = physical interaction, green = genetic interaction. (b) Mutation frequency (% any mutation) in all cell lines where both CRISPR screen data and mutation data were available, n=808. Includes all genes identified in Fig. 3e and Supplementary Fig. 6b, the last five genes are, thus, only found in one of the top 10 lists. (c) Heat map showing mutations (white = WT, black = any mutation) of the indicated genes (all genes identified in Fig. 3E and Supplementary Fig. 6B). Data is based on all available data in the Depmap CRISPR (Avana) 20Q4, and Mutation Public 20Q4 releases.

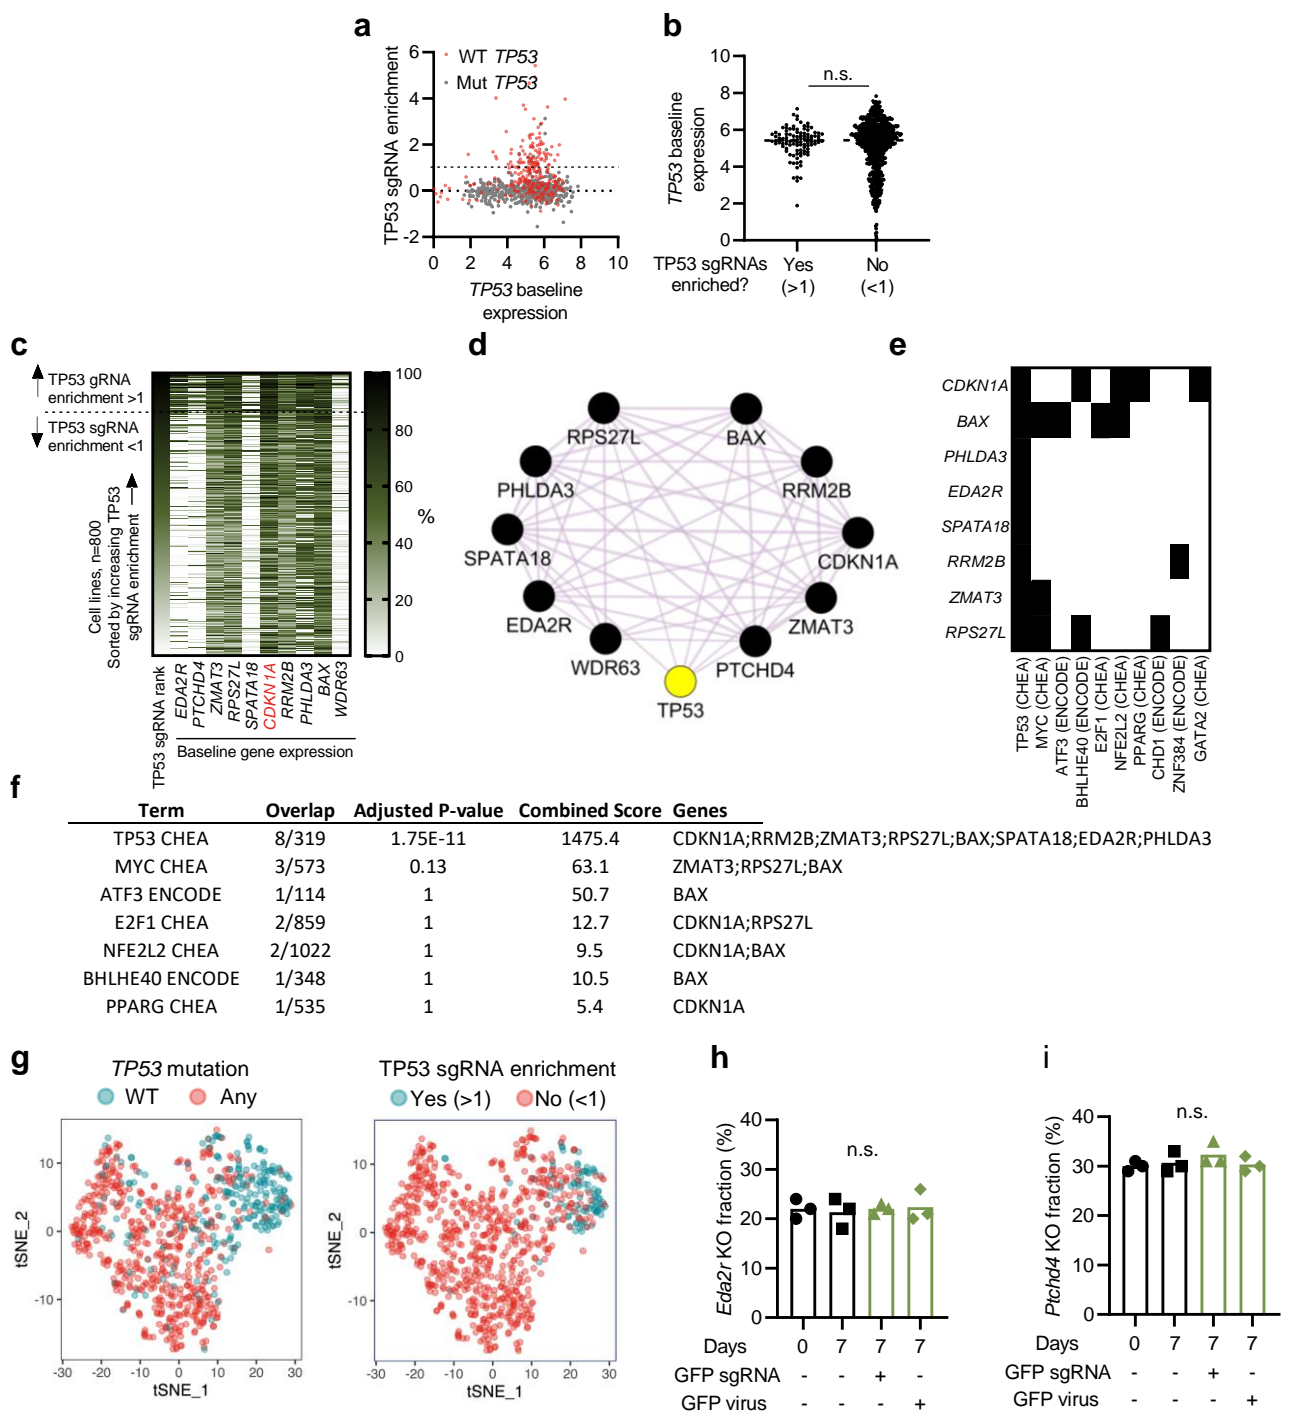

**Supplementary Figure 9. p53 target gene expression, but not TP53 expression, predicts TP53 sgRNA enrichment.** (a-b) Correlation between TP53 sgRNA enrichment and TP53 baseline expression. (c) Baseline expression of the ten selected genes in 800 cell lines sorted by TP53 sgRNA enrichment rank. For visualization purposes, the expression is normalized to 0-100%, where the highest expression of each gene is defined as 100% and the lowest as 0%. (d) Interactions of the ten genes identified by geneMANIA: purple = co-expression. (e-f) Transcription factor binding to the top ten genes analyzed by the Enrichr software: ENCODE and ChEA Consensus TFs from ChIP-X. (e) Target genes (y-axis) for different transcription factors (TF, x-axis) indicated with black color. (f) Statistical analysis of as calculated by the Enrichr software of TFs linked to the gene set. (g) tSNE dimensionality reduction analysis of cells based on the expression of the 10 selected genes (same data as Fig. 3j but divided into two graphs for clarity). The colors indicate TP53 mutation state (left) and TP53 sgRNA enrichment (right). (h-i) WT and *Eda2r* (h), or *Ptchd4* (i) KO Hox cells (Cas9+ and GFP+) were mixed and electroporated with a GFP sgRNA or transduced with a GFP sgRNA virus. Cells were cultured for seven days, followed by sequencing of *Eda2r* (h), or *Ptchd4* (i) to quantify the frequency of mutations. Data presented as individual cell lines (each dot/line represents one human cell line), n=800 (a-c, g), or as mean and individual data (h-i). Data includes all available data in the Depmap CRISPR (Avana), and Expression Public 20Q4 releases. Statistics based on unpaired T-test (b, h-i), n.s. = non-significant.

## Supplementary tables:

1. sgRNA library.
2. Genes enriched/depleted in primary screen (related to Sup. Fig. 4a-d, g-i).
3. Cell lines included in Depmap with TP53 sgRNA enrichment (related to Fig. 3a).
4. Extended list of sgRNAs correlating to TP53 sgRNA enrichment (related to Fig. 3e).
5. Extended list of sgRNAs correlating to TP53 mutation status (related to Sup. Fig. 7b).
6. Extended list of gene expression correlating to TP53 sgRNA enrichment (related to Fig. 3i).
7. Reagents (stock solution and storage)
8. sgRNAs and primers used for electroporation.
9. Primers used for NGS analysis of CRISPR screens.
10. Read count first screen
11. Read count second screen
